# Supplementary material for: Unusual nucleophilic reactivity of a dithiolene-based N-heterocyclic silane
Source: Royal Society of Chemistry journal article supplement (doi:10.1039/d3dt03843b), 2024-01-01
Supplement: d3dt03843b1.pdf [file d3dt03843b1.pdf]

## SUPPORTING INFORMATION of SYNTHESSES, STRUCTURES, AND COMPUTATIONS

### Unusual nucleophilic reactivity of a dithiolene-based N-heterocyclic silane

Phuong M. Tran, Yuzhong Wang, Mitchell E. Lahm, Pingrong Wei,  
Henry F. Schaefer III, and Gregory H. Robinson\*

*Department of Chemistry and the Center for Computational Chemistry, The  
University of Georgia, Athens, Georgia 30602-2556, United States.*

To whom correspondence should be addressed. Email: robinson@uga.edu

### Table of Contents

|                                                                                                                                       |         |
|---------------------------------------------------------------------------------------------------------------------------------------|---------|
| 1) Synthesis and NMR spectra of <b>2</b> , <b>5</b> , <b>6</b> , <b>7</b> , <b>9</b> , <b>10</b> , and <b>12</b>                      | S2-S15  |
| 2) Computational data of <b>5-Ph</b> , <b>6</b> , <b>7</b> , <b>8-Ph</b> , <b>9-Ph</b> , and <b>10-Ph</b>                             | S16-S23 |
| 3) X-ray Data of <b>5</b> ·(toluene) <sub>2</sub> , <b>6</b> , <b>7</b> , <b>8</b> , <b>9</b> ·(toluene) <sub>2</sub> , and <b>10</b> | S24-S53 |
| 4) References                                                                                                                         | S54     |

## SUPPORTING INFORMATION of SYNTHESSES

### Materials and Methods

#### General.

The syntheses of air-sensitive compounds were performed under purified argon using Schlenk techniques and an inert atmosphere drybox (M-Braun LabMaster SP). Chemicals were purchased from Aldrich and Strem and used as received. The solvents were dried and distilled under argon from Na/benzophenone prior to use.  $^1\text{H}$ ,  $^{11}\text{B}$ ,  $^{11}\text{B}\{^1\text{H}\}$ ,  $^{13}\text{C}\{^1\text{H}\}$  and  $^{29}\text{Si}\{^1\text{H}\}$  NMR spectra were recorded on a Bruker Avance III HD 400 MHz spectrometer and a Bruker Avance Neo 600MHz spectrometer equipped with a 5mm BBO probe. The chemical shifts were referenced to an external standard of  $\text{BF}_3\cdot\text{OEt}_2$  for  $^{11}\text{B}$  and  $^{11}\text{B}\{^1\text{H}\}$  and TMS for  $^{29}\text{Si}\{^1\text{H}\}$  NMR spectra. X-ray intensity data for **5**·(toluene)<sub>2</sub>, **6**, **7**, **8**, **9**·(toluene)<sub>2</sub>, and **10** were collected at 135K on a Bruker D8 Quest PHOTON 100 CMOS X-ray diffractometer system with Incoatec Microfocus Source ( $I\mu\text{S}$ ) monochromated Mo  $K\alpha$  radiation ( $\lambda = 0.71073 \text{ \AA}$ , sealed tube) using phi and omega-scan technique.

**Compound 2:** To a Schlenk tube charged with **1** (0.200 g, 0.494 mmol) in 10 mL of toluene was added a solution of 0.60 mL of  $\text{BBr}_3$  (1.0 M in hexane, 0.600 mmol) in 5 mL of toluene. The reaction mixture was then stirred at room temperature overnight. After the solvent was removed in vacuum, the residue was extracted with 15 mL of hexane. Removing hexane from the filtrate in vacuum gave **2** as colorless crystalline powder (0.212 g, 65 % yield). The NMR data of **2** are consistent with the reported values.<sup>1</sup>

**Compound 5:** To a Schlenk tube charged with **4** (0.200 g, 0.225 mmol) in 4 mL of toluene was slowly added a solution of 0.50 mL of  $\text{BBr}_3$  (1.0 M in hexane, 0.500 mmol) in 4 mL of toluene. The reaction mixture was then stirred at room temperature for 2h. After filtration and subsequent rinsed with 15 mL of hexane, the residue was dried under vacuum, giving **5** as pale yellow solid (0.252 g, 81 % yield) (Note: the  $^{11}\text{B}$  NMR spectrum of **5** indicates the presence of some impurity in this solid). X-ray quality yellow crystals of **5** were obtained via recrystallization in toluene. Mp: gradually decomposed ( $>143 \text{ }^\circ\text{C}$ ) and melt at  $250 \text{ }^\circ\text{C}$ .  $^1\text{H}$  NMR (400.22 MHz,  $\text{C}_6\text{D}_6$ ):  $\delta$  0.60 [d, 3H,  $\text{CH}(\text{CH}_3)_2$ ], 0.77 [d, 3H,  $\text{CH}(\text{CH}_3)_2$ ], 0.88 [m, 9H,  $\text{CH}(\text{CH}_3)_2$ ], 0.93 [d, 3H,  $\text{CH}(\text{CH}_3)_2$ ], 1.08 [m, 12H,  $\text{CH}(\text{CH}_3)_2$ ], 1.25 [d, 3H,  $\text{CH}(\text{CH}_3)_2$ ], 1.28 [d, 3H,  $\text{CH}(\text{CH}_3)_2$ ], 1.37 [d, 3H,  $\text{CH}(\text{CH}_3)_2$ ], 1.42 [d, 6H,  $\text{CH}(\text{CH}_3)_2$ ], 1.51 [d, 3H,  $\text{CH}(\text{CH}_3)_2$ ], 2.71 [m, 3H,  $\text{CH}(\text{CH}_3)_2$ ], 2.94 [m, 1H,  $\text{CH}(\text{CH}_3)_2$ ], 3.04 [m, 1H,  $\text{CH}(\text{CH}_3)_2$ ], 3.15 [m, 2H,  $\text{CH}(\text{CH}_3)_2$ ], 3.31 [m, 1H,  $\text{CH}(\text{CH}_3)_2$ ], 5.61 [bs, 1H,  $\text{NC-H}$ ], 6.05 [s, 1H,  $\text{N=CH}$ ], 6.74 [d, 1H,  $\text{Ar-H}$ ], 6.84 [d, 1H,  $\text{Ar-H}$ ], 6.90-7.16 [m, 10H,  $\text{Ar-H}$ ].  $^{11}\text{B}$  NMR (128.39 MHz,  $\text{C}_6\text{D}_6$ ):  $\delta$  -10.97 [d,  $^2J_{\text{BH}} = 7.8 \text{ Hz}$ ,  $\text{NCBBR}_3$ ], -6.37 [s,  $\text{SBBR}_3$ ].  $^{11}\text{B}\{^1\text{H}\}$  NMR (128.42 MHz,  $\text{C}_6\text{D}_6$ ):  $\delta$  -10.97 [ $\text{NCBBR}_3$ ], -6.36 [ $\text{SBBR}_3$ ].  $^{29}\text{Si}\{^1\text{H}\}$  NMR (79.51 MHz, toluene- $d_8$ ):  $\delta$  8.12. Crystal data for **5**·(toluene)<sub>2</sub>:  $\text{C}_{67}\text{H}_{86}\text{B}_2\text{Br}_6\text{N}_4\text{S}_3\text{Si}$ , fw = 1572.74, triclinic, P-1,  $a = 11.0692(8) \text{ \AA}$ ,  $b = 16.5906(12) \text{ \AA}$ ,  $c = 21.0529(15) \text{ \AA}$ ,  $\alpha = 81.044(2)^\circ$ ,  $\beta = 83.385(2)^\circ$ ,  $\gamma = 71.370(2)^\circ$ ,  $V = 3610.1(5) \text{ \AA}^3$ ,  $Z = 2$ ,  $R_1 = 0.0441$  for 18897 data ( $I > 2\sigma(I)$ ),  $wR_2 = 0.1072$  (all data).

Compound **6** and **7**: To a Schlenk tube charged with **5** (0.1 g, 0.064 mmol) in 15 mL of toluene was added 0.15 mL of BBr<sub>3</sub> (1.0 M in hexane, 0.150 mmol). The reaction mixture was then heated to 100 °C and stirred overnight. After the solvent was removed in vacuum, the residue was combined with 4 mL of toluene. The slurry was heated under reflux and kept stationary at room temperature over 5 days, giving a mixture of X-ray quality colorless crystals of **6** and **7** in ca. 1:1 ratio (in terms of the <sup>1</sup>H NMR data). Crystals of **6** and **7** were manually separated based on their different shape (**6**: square blocks, **7**: long rods) for the NMR analyses. For **6**: Mp: gradually decomposed (>150 °C) and melt at 235 °C. <sup>1</sup>H NMR (400.22 MHz, C<sub>6</sub>D<sub>6</sub>): δ 1.18 [d, 12H, CH(CH<sub>3</sub>)<sub>2</sub>], 1.28 [d, 12H, CH(CH<sub>3</sub>)<sub>2</sub>], 2.91 [m, 4H, CH(CH<sub>3</sub>)<sub>2</sub>], 6.75 [s, 2H, NCH], 7.12 [d, 4H, Ar-H], 7.22 [t, 2H, Ar-H]. <sup>11</sup>B NMR (128.42 MHz, C<sub>6</sub>D<sub>6</sub>): δ 28.60 (bs). <sup>13</sup>C {<sup>1</sup>H} NMR (100.65 MHz, C<sub>6</sub>D<sub>6</sub>): δ 24.32, 25.54 [CH(CH<sub>3</sub>)<sub>2</sub>], 29.07 [CH(CH<sub>3</sub>)<sub>2</sub>], 125.52 [NCCN], 127.15, 129.95, 137.19, 145.01 [Ar-C]. Crystal data for **6**: C<sub>26</sub>H<sub>36</sub>B<sub>2</sub>Br<sub>4</sub>N<sub>2</sub>, fw = 717.83, triclinic, P-1, *a* = 10.8955(14) Å, *b* = 12.618(2) Å, *c* = 12.7576(15) Å, *α* = 73.361(5)°, *β* = 89.927(4)°, *γ* = 64.433(4)°, *V* = 1500.7(4) Å<sup>3</sup>, *Z* = 2, R<sub>1</sub> = 0.0441 for 5372 data (*I* > 2σ(*I*)), wR<sub>2</sub> = 0.1206 (all data). For **7**: Mp: gradually decomposed (>137 °C) and melt at 217 °C. <sup>1</sup>H NMR (400.22 MHz, C<sub>6</sub>D<sub>6</sub>): δ 0.99 [d, 12H, CH(CH<sub>3</sub>)<sub>2</sub>], 1.42 [d, 12H, CH(CH<sub>3</sub>)<sub>2</sub>], 2.79 [m, 4H, CH(CH<sub>3</sub>)<sub>2</sub>], 7.06 [d, 4H, Ar-H], 7.19 [t, 2H, Ar-H]. <sup>11</sup>B NMR (128.42 MHz, C<sub>6</sub>D<sub>6</sub>): δ -6.36 [s, SBBr<sub>3</sub>], 51.15 [bs, SBS]. <sup>13</sup>C {<sup>1</sup>H} NMR (100.65 MHz, C<sub>6</sub>D<sub>6</sub>): δ 24.54, 25.53 [CH(CH<sub>3</sub>)<sub>2</sub>], 29.98 [CH(CH<sub>3</sub>)<sub>2</sub>], 126.07 [NCCN], 129.03, 131.52, 132.67, 146.63 [Ar-C]. Crystal data for **7**: C<sub>27</sub>H<sub>34</sub>B<sub>2</sub>Br<sub>4</sub>N<sub>2</sub>S<sub>3</sub>, fw = 824.00, monoclinic, P2<sub>1</sub>/c, *a* = 18.3185(13) Å, *b* = 9.6977(7) Å, *c* = 18.5961(13) Å, *α* = 90°, *β* = 94.033(3)°, *γ* = 90°, *V* = 3295.4(4) Å<sup>3</sup>, *Z* = 4, R<sub>1</sub> = 0.0408 for 5784 data (*I* > 2σ(*I*)), wR<sub>2</sub> = 0.0877 (all data).

Compound **9**: To a Schlenk tube charged with **4** (0.200 g, 0.225 mmol) in 5 mL of toluene was slowly added a solution of BI<sub>3</sub> (0.176 g, 0.450 mmol) in 10 mL of toluene. The reaction mixture was then stirred at room temperature overnight. After filtration, the filtrate was concentrated under vacuum to approximately 2 mL. The resulting pale-yellow crystallized powder of **9** was subsequently isolated and dried under vacuum. Yield: 0.269 g (72%). X-ray quality pale-yellow crystals of **9** were obtained via recrystallization in toluene. Mp: gradually decomposed (>169 °C) and melt at 231 °C. <sup>1</sup>H NMR (599.98 MHz, C<sub>6</sub>D<sub>6</sub>): δ 1.04 [d, 6H, CH(CH<sub>3</sub>)<sub>2</sub>], 1.11 [d, 6H, CH(CH<sub>3</sub>)<sub>2</sub>], 1.17 [d, 6H, CH(CH<sub>3</sub>)<sub>2</sub>], 1.20 [d, 12H, CH(CH<sub>3</sub>)<sub>2</sub>], 1.27 [d, 6H, CH(CH<sub>3</sub>)<sub>2</sub>], 1.51 [d, 6H, CH(CH<sub>3</sub>)<sub>2</sub>], 1.58 [d, 6H, CH(CH<sub>3</sub>)<sub>2</sub>], 2.68 [m, 2H, CH(CH<sub>3</sub>)<sub>2</sub>], 2.83 [m, 2H, CH(CH<sub>3</sub>)<sub>2</sub>], 2.87 [m, 2H, CH(CH<sub>3</sub>)<sub>2</sub>], 2.97 [m, 2H, CH(CH<sub>3</sub>)<sub>2</sub>], 6.25 [d, 1H, NCH], 6.76 [d, 1H, NCH], 7.01-7.19 [m, 12H, Ar-H]. <sup>11</sup>B NMR (192.50 MHz, C<sub>6</sub>D<sub>6</sub>): δ -82.85 [bs, SBI<sub>3</sub>], 6.02 [bs, NBI<sub>2</sub>]. <sup>29</sup>Si {<sup>1</sup>H} NMR (119.20 MHz, C<sub>6</sub>D<sub>6</sub>): δ -18.80. <sup>13</sup>C {<sup>1</sup>H} NMR (150.88 MHz, C<sub>6</sub>D<sub>5</sub>Br): δ 24.25, 24.32, 24.87, 25.17, 25.81, 25.84, 26.11 [CH(CH<sub>3</sub>)<sub>2</sub>], 29.08, 29.66, 29.85, 30.03 [CH(CH<sub>3</sub>)<sub>2</sub>], 124.48, 127.22 [NCCN], 125.54, 125.81, 126.03, 126.08, 126.36, 128.90, 129.67, 132.15, 133.02, 134.82, 139.63, 144.61, 146.54, 146.58, 147.25 [Ar-C and SCCS]. Crystal data for **9**·(toluene): C<sub>67</sub>H<sub>86</sub>B<sub>2</sub>I<sub>6</sub>N<sub>4</sub>S<sub>3</sub>Si, fw = 1854.68, monoclinic, P2<sub>1</sub>/c, *a* = 20.950(19) Å, *b* = 12.762(11) Å, *c* = 28.79(2) Å, *α* = 90°, *β* = 101.17(3)°, *γ* = 90°, *V* = 7552(11) Å<sup>3</sup>, *Z* = 4, R<sub>1</sub> = 0.0661 for 7518 data (*I* > 2σ(*I*)), wR<sub>2</sub> = 0.1052 (all data).

Compound **10**: To a Schlenk tube charged with **4** (0.200 g, 0.225 mmol) in 5 mL of toluene was slowly added a solution of 0.45 mL of BCl<sub>3</sub> (1.0 M in heptane, 0.450 mmol) in 5 mL

of toluene. The reaction mixture was then stirred at room temperature overnight. After the volatile materials were removed in vacuum, the residue was washed with hexane, giving **10** as white powder (0.043 g, 19% yield). X-ray quality colorless crystals of **10** were obtained by concentrating the parent solution at room temperature. Mp: gradually decomposed ( $>121$  °C) and melt at 222 °C.  $^1\text{H}$  NMR (599.98 MHz,  $\text{C}_6\text{D}_5\text{Br}$ ):  $\delta$  0.28 [d, 3H,  $\text{CH}(\text{CH}_3)_2$ ], 0.64 [d, 3H,  $\text{CH}(\text{CH}_3)_2$ ], 1.03 [d, 3H,  $\text{CH}(\text{CH}_3)_2$ ], 1.09 [d, 3H,  $\text{CH}(\text{CH}_3)_2$ ], 1.12 [d, 9H,  $\text{CH}(\text{CH}_3)_2$ ], 1.23 [m, 9H,  $\text{CH}(\text{CH}_3)_2$ ], 1.27 [d, 3H,  $\text{CH}(\text{CH}_3)_2$ ], 1.31 [d, 3H,  $\text{CH}(\text{CH}_3)_2$ ], 1.34 [m, 6H,  $\text{CH}(\text{CH}_3)_2$ ], 1.37 [d, 3H,  $\text{CH}(\text{CH}_3)_2$ ], 1.40 [d, 3H,  $\text{CH}(\text{CH}_3)_2$ ], 2.50 [m, 1H,  $\text{CH}(\text{CH}_3)_2$ ], 2.67 [m, 1H,  $\text{CH}(\text{CH}_3)_2$ ], 2.74 [m, 1H,  $\text{CH}(\text{CH}_3)_2$ ], 2.84 [m, 1H,  $\text{CH}(\text{CH}_3)_2$ ], 2.98 [m, 1H,  $\text{CH}(\text{CH}_3)_2$ ], 3.08 [m, 1H,  $\text{CH}(\text{CH}_3)_2$ ], 3.54 [m, 1H,  $\text{CH}(\text{CH}_3)_2$ ], 3.78 [m, 1H,  $\text{CH}(\text{CH}_3)_2$ ], 5.73 [m, 2H, NCH], 6.95-7.28 [m, 12H, Ar-H].  $^{11}\text{B}$  NMR (192.50 MHz,  $\text{C}_6\text{D}_5\text{Br}$ ):  $\delta$  53.28 (bs).  $^{29}\text{Si}\{^1\text{H}\}$  NMR (119.20 MHz,  $\text{C}_6\text{D}_5\text{Br}$ ):  $\delta$  -33.47.  $^{13}\text{C}\{^1\text{H}\}$  NMR (150.88 MHz,  $\text{C}_6\text{D}_5\text{Br}$ ):  $\delta$  22.10, 22.55, 22.75, 23.04, 23.48, 23.62, 23.78, 24.05, 24.14, 24.51, 24.75, 24.83, 25.80, 26.06, 26.21, 26.29, 26.83 [ $\text{CH}(\text{CH}_3)_2$ ], 28.05, 28.36, 28.76, 28.81, 28.85, 28.92 [ $\text{CH}(\text{CH}_3)_2$ ], 119.83, 120.16 [NCCN], 122.03, 122.31, 123.50, 123.89, 124.08, 124.22, 124.30, 124.88, 128.08, 128.16, 128.97, 130.16, 130.36, 131.96, 132.06, 135.37, 136.16, 146.09, 146.36, 147.24, 147.31, 147.48, 147.53, 147.58 [Ar-C and SCCS], 169.73 [C=S]. Crystal data for **10**:  $\text{C}_{53}\text{H}_{70}\text{BCl}_3\text{N}_4\text{S}_3\text{Si}$ , fw = 1004.56, monoclinic,  $\text{P}2_1/c$ ,  $a = 14.4876(10)$  Å,  $b = 20.1276(13)$  Å,  $c = 18.9921(12)$  Å,  $\alpha = 90^\circ$ ,  $\beta = 91.557(2)^\circ$ ,  $\gamma = 90^\circ$ ,  $V = 5536.1(6)$  Å<sup>3</sup>,  $Z = 4$ ,  $R_1 = 0.0566$  for 6835 data ( $I > 2\sigma(I)$ ),  $wR_2 = 0.1141$  (all data).

Compound **12**: To a Schlenk tube charged with **4** (0.200 g, 0.225 mmol) in 5 mL of toluene was slowly added a solution of 1.15 mL of  $\text{BCl}_3$  (1.0 M in heptane, 1.150 mmol) in 5 mL of toluene. The reaction mixture was then stirred at room temperature for 2h. After the volatile materials were removed in vacuum, the residue was recrystallized in hot hexane, giving **12** as colorless crystallized solid (0.071 g, 58% yield). Mp: gradually decomposed ( $>154$  °C) and melt at 262 °C.  $^1\text{H}$  NMR (599.98 MHz,  $\text{C}_6\text{D}_6$ ):  $\delta$  1.16 [d, 12H,  $\text{CH}(\text{CH}_3)_2$ ], 1.26 [d, 12H,  $\text{CH}(\text{CH}_3)_2$ ], 2.93 [m, 4H,  $\text{CH}(\text{CH}_3)_2$ ], 6.51 [s, 2H, NCH], 7.11 [d, 4H, Ar-H], 7.20 [t, 2H, Ar-H].  $^{11}\text{B}$  NMR (192.50 MHz,  $\text{C}_6\text{D}_6$ ):  $\delta$  32.27 (s,  $w_{1/2} = 230$  Hz).  $^{13}\text{C}\{^1\text{H}\}$  NMR (150.88 MHz,  $\text{C}_6\text{D}_6$ ):  $\delta$  24.40, 25.24 [ $\text{CH}(\text{CH}_3)_2$ ], 28.98 [ $\text{CH}(\text{CH}_3)_2$ ], 124.63 [NCCN], 125.40, 129.86, 135.96, 145.33 [Ar-C].

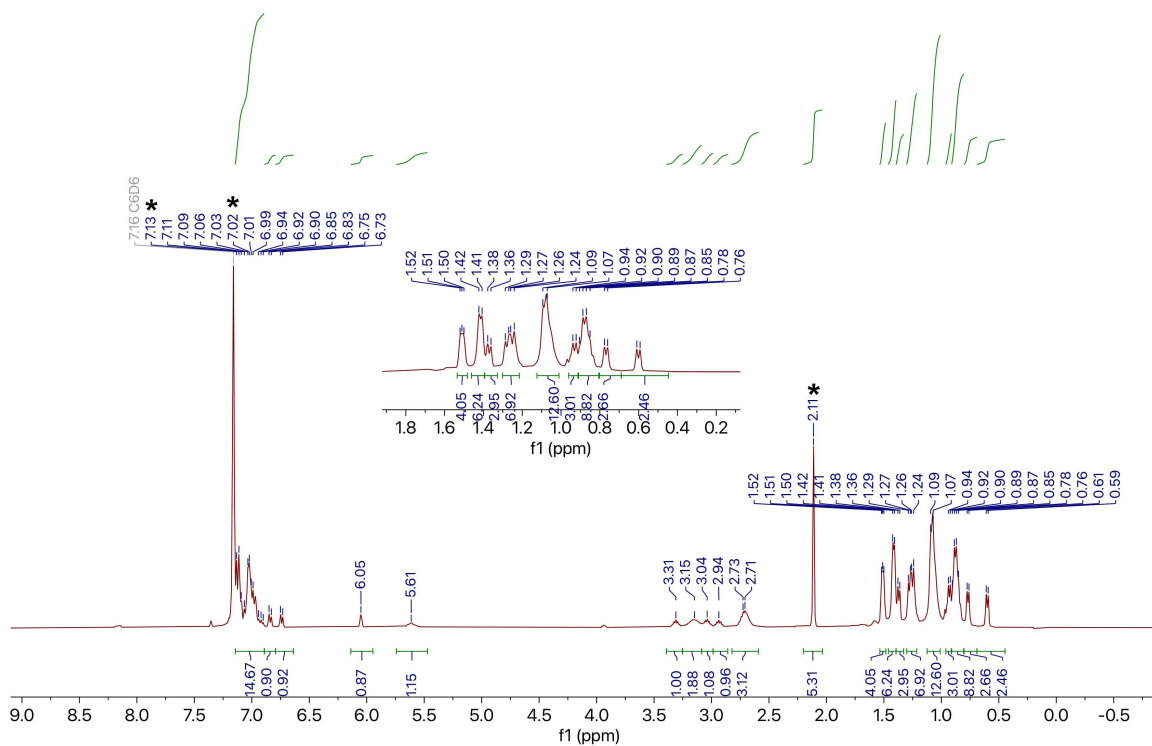

**Figure S1.**  $^1\text{H}$  NMR spectrum of **5** in  $\text{C}_6\text{D}_6$  (\* resonances of toluene).

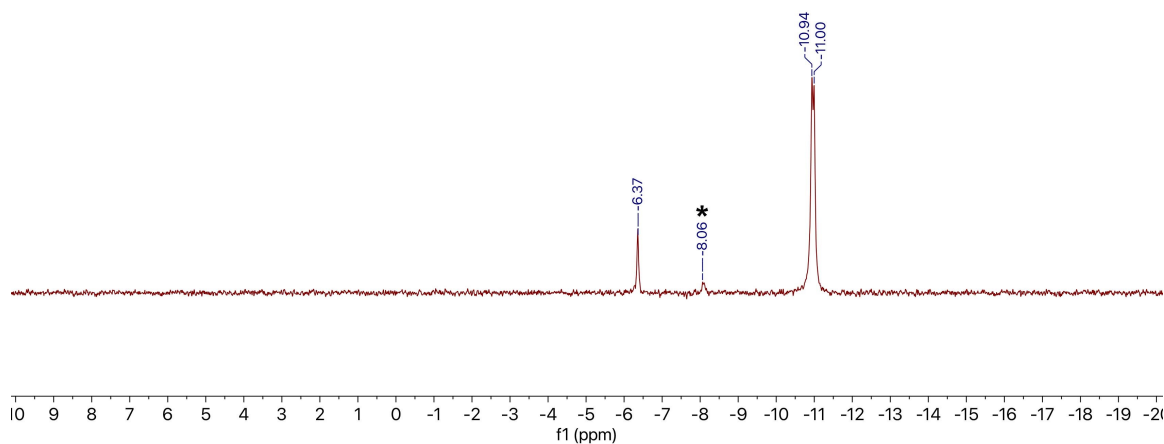

**Figure S2.**  $^{11}\text{B}$  NMR spectrum of **5** in  $\text{C}_6\text{D}_6$  (\* resonance of impurity).

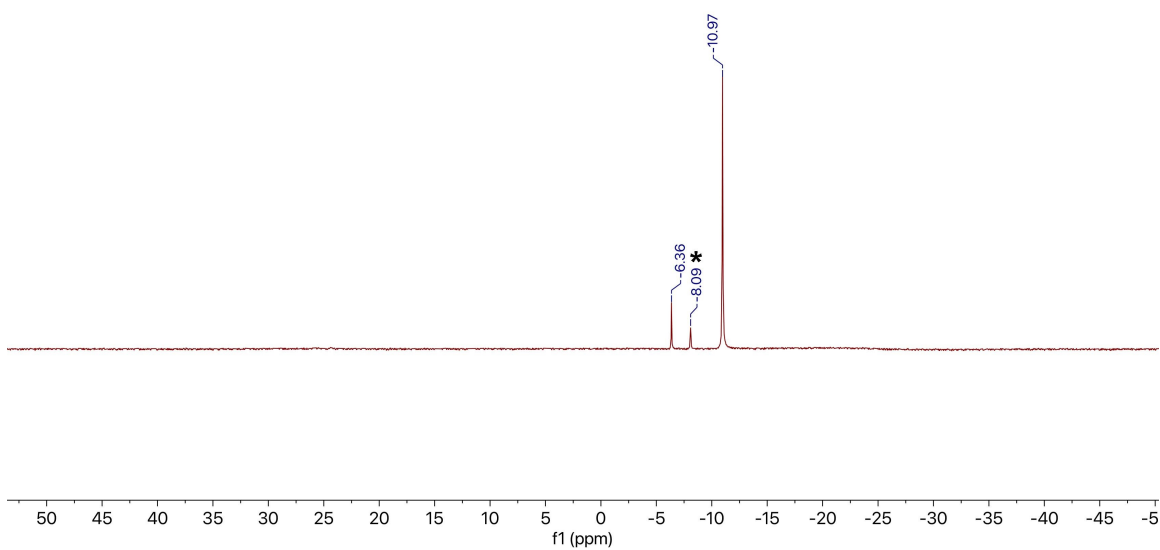

**Figure S3.**  $^{11}\text{B}\{^1\text{H}\}$  NMR spectrum of **5** in  $\text{C}_6\text{D}_6$  (\* resonance of impurity).

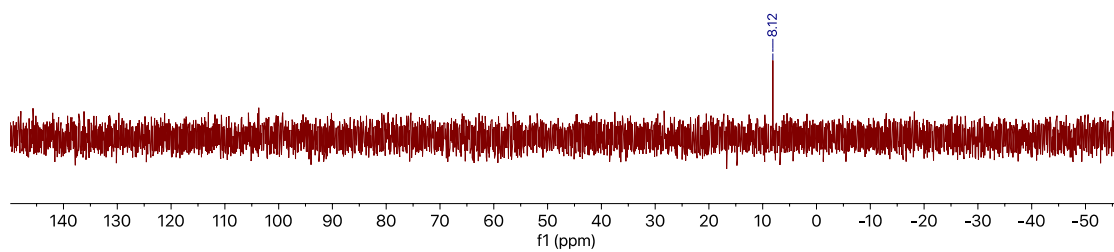

**Figure S4.**  $^{29}\text{Si}\{^1\text{H}\}$  NMR spectrum of **5** in Toluene- $\text{d}_8$ .

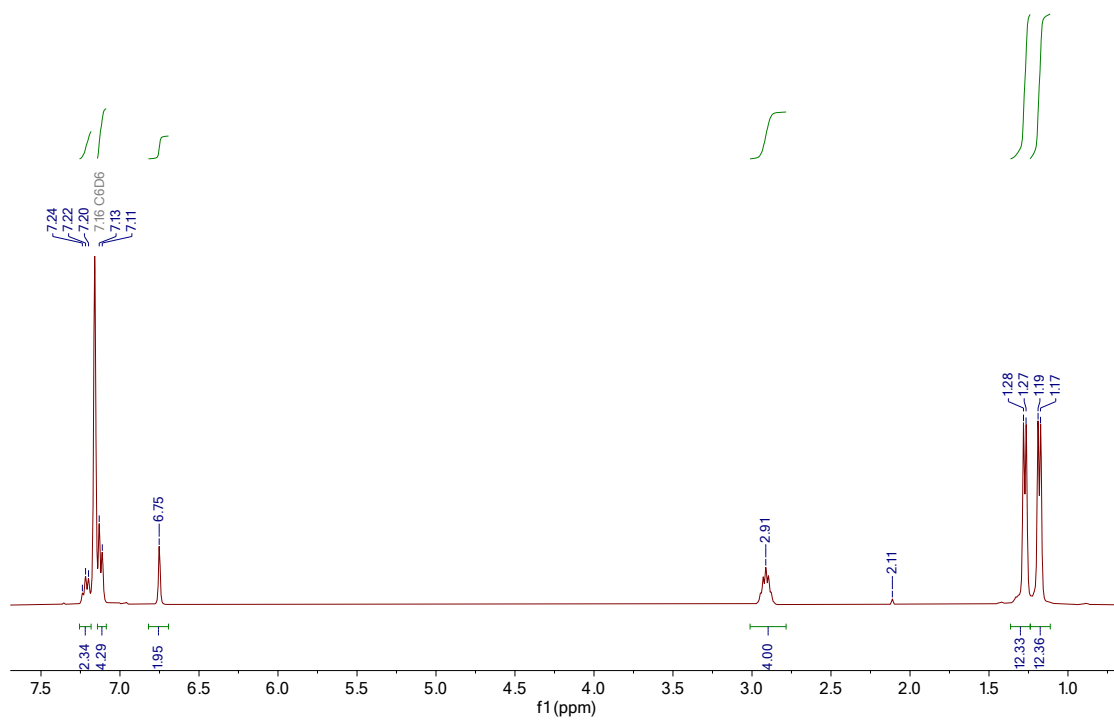

**Figure S5.** <sup>1</sup>H NMR spectrum of **6** in C<sub>6</sub>D<sub>6</sub>.

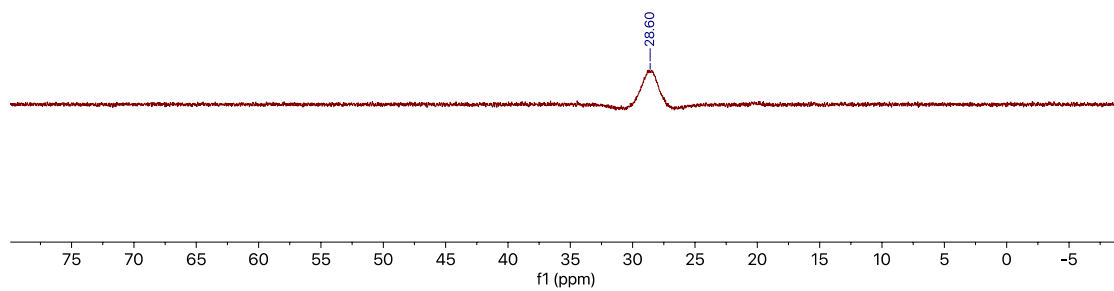

**Figure S6.** <sup>11</sup>B NMR spectrum of **6** in C<sub>6</sub>D<sub>6</sub>.

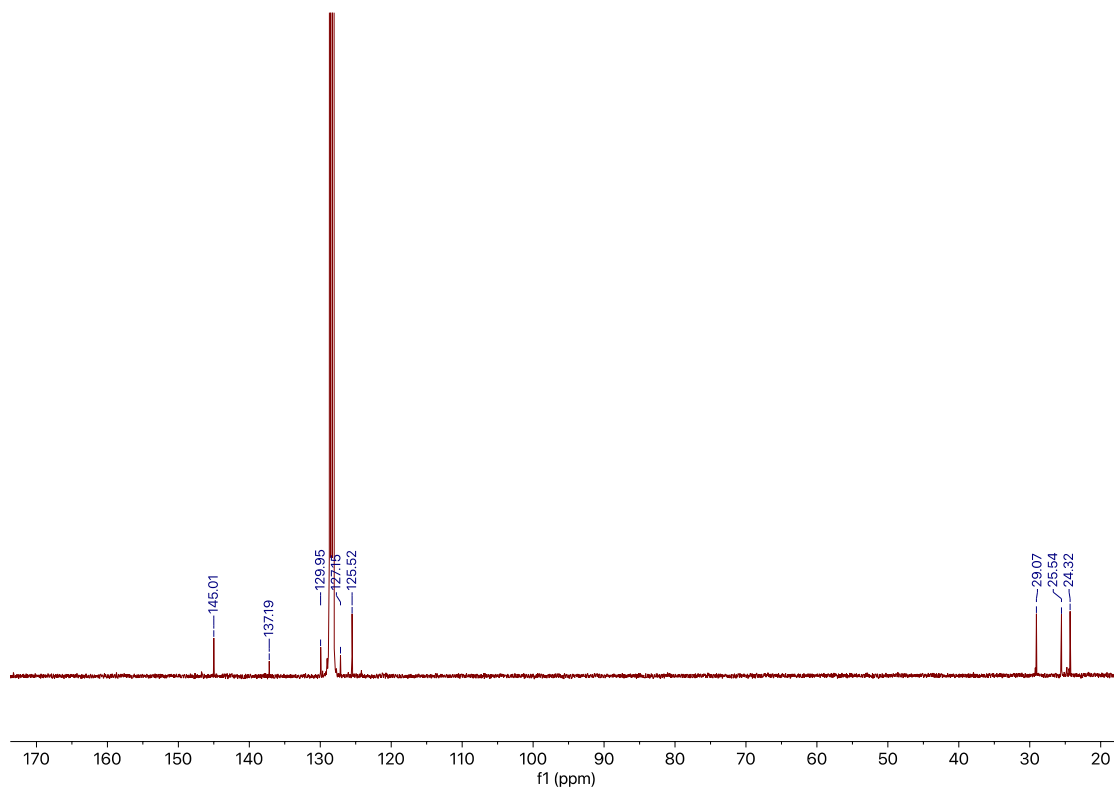

**Figure S7.**  $^{13}\text{C}\{^1\text{H}\}$  NMR spectrum of **6** in  $\text{C}_6\text{D}_6$ .



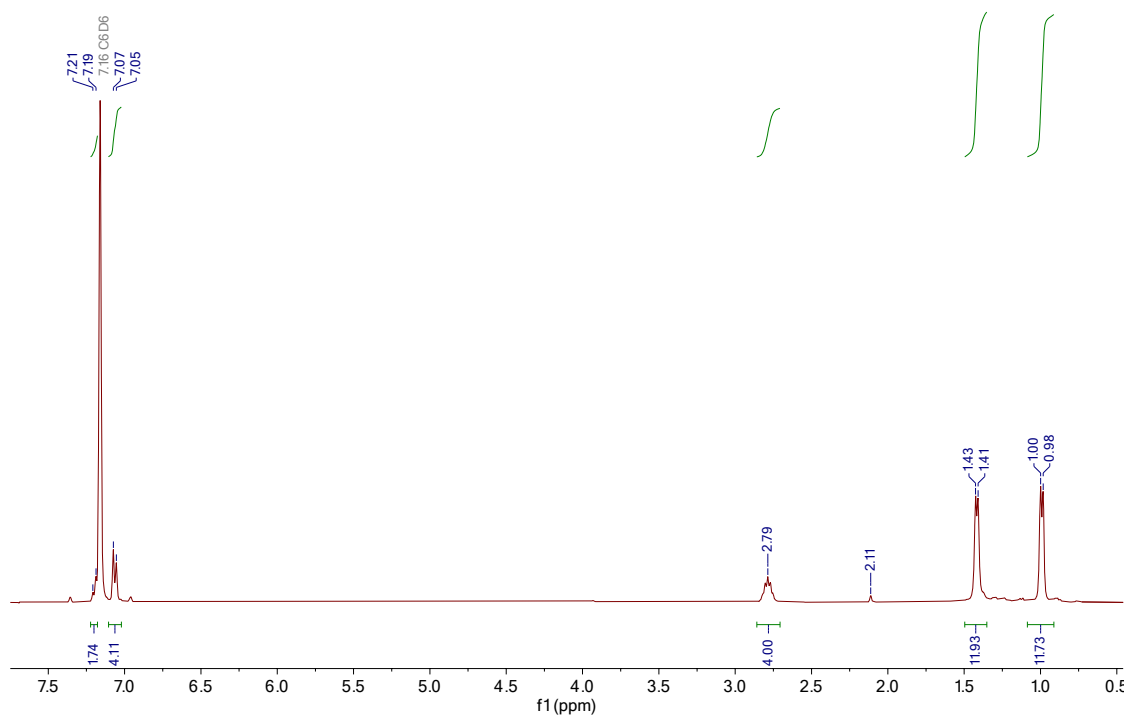

**Figure S8.**  $^1\text{H}$  NMR spectrum of **7** in  $\text{C}_6\text{D}_6$ .

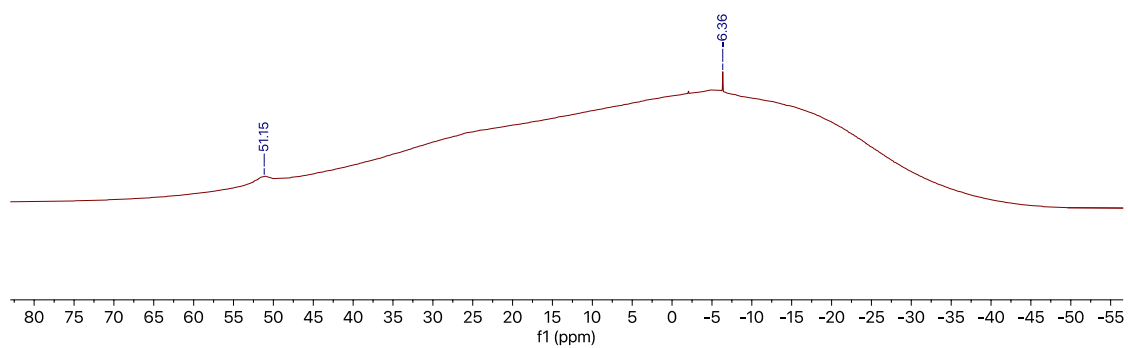

**Figure S9.**  $^{11}\text{B}$  NMR spectrum of **7** in  $\text{C}_6\text{D}_6$ .

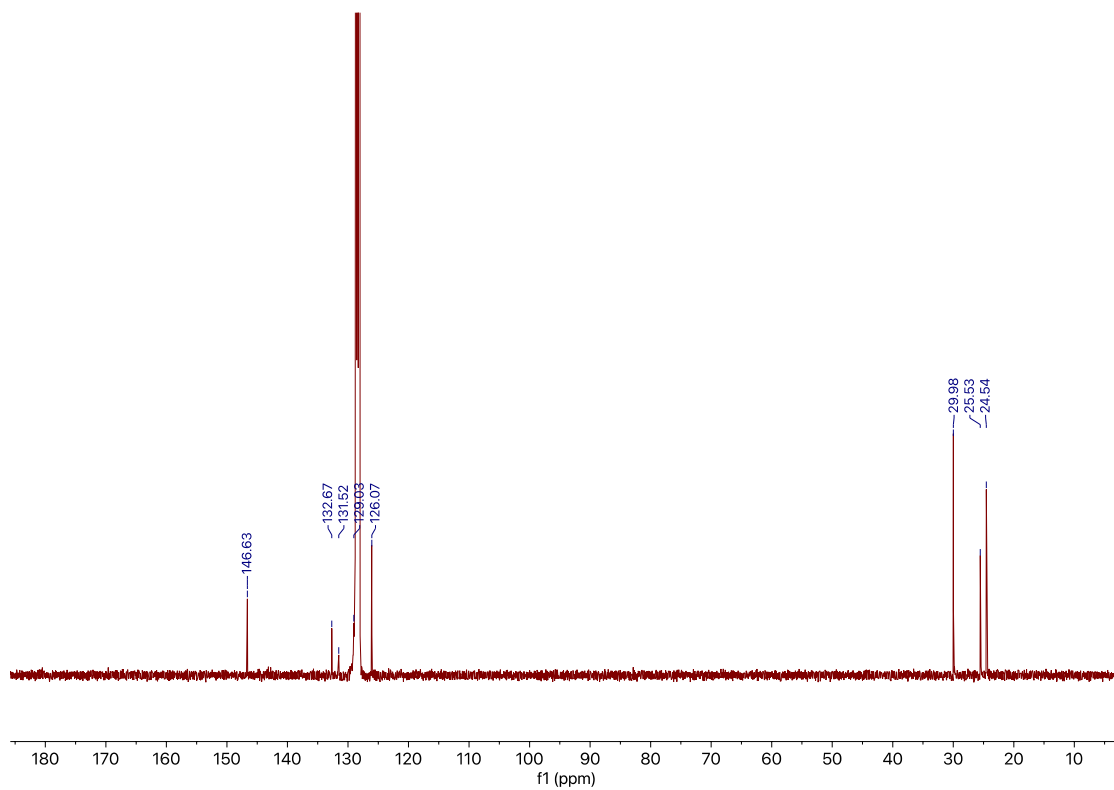

**Figure S10.** <sup>13</sup>C{<sup>1</sup>H} NMR spectrum of **7** in C<sub>6</sub>D<sub>6</sub>.

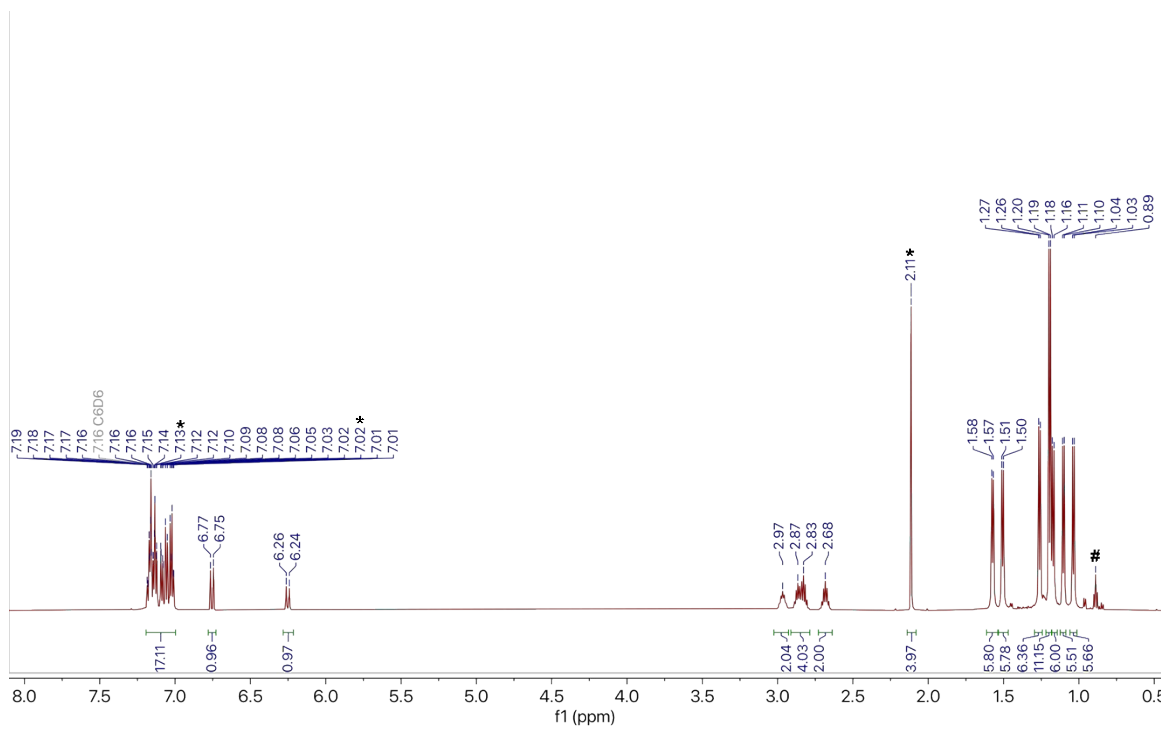

**Figure S11.** <sup>1</sup>H NMR spectrum of **9** in C<sub>6</sub>D<sub>6</sub> (\* resonances of toluene, # resonance of hexane).

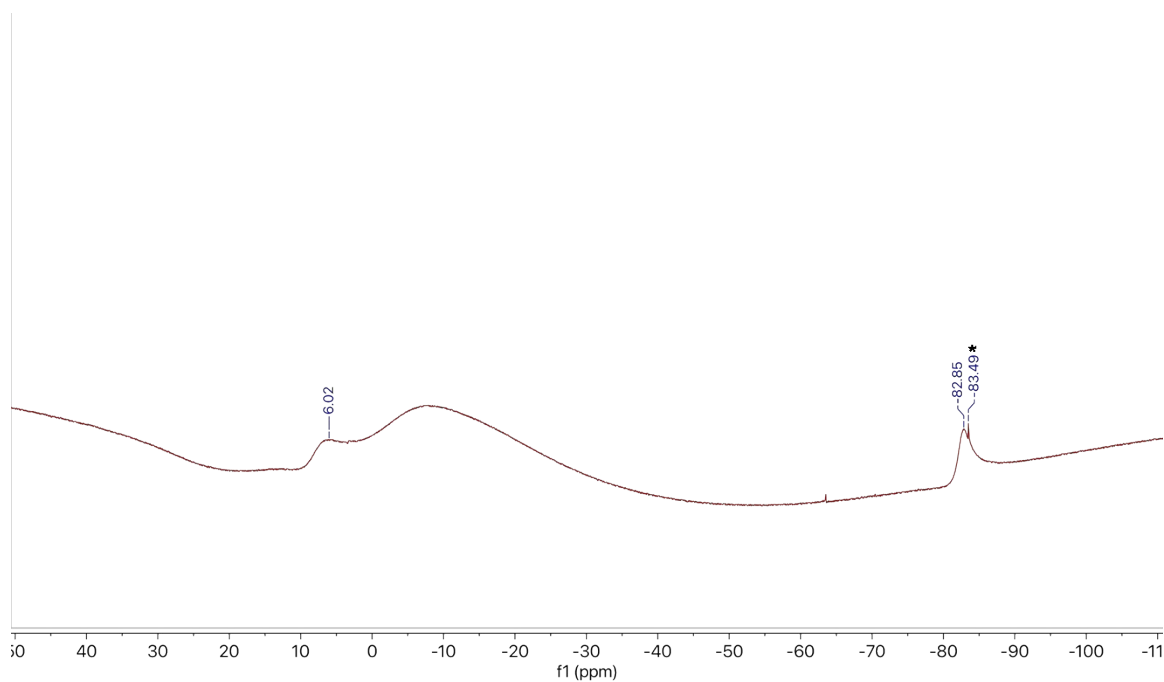

**Figure S12.**  $^{11}\text{B}$  NMR spectrum of **9** in  $\text{C}_6\text{D}_6$  (\* resonance of impurity).

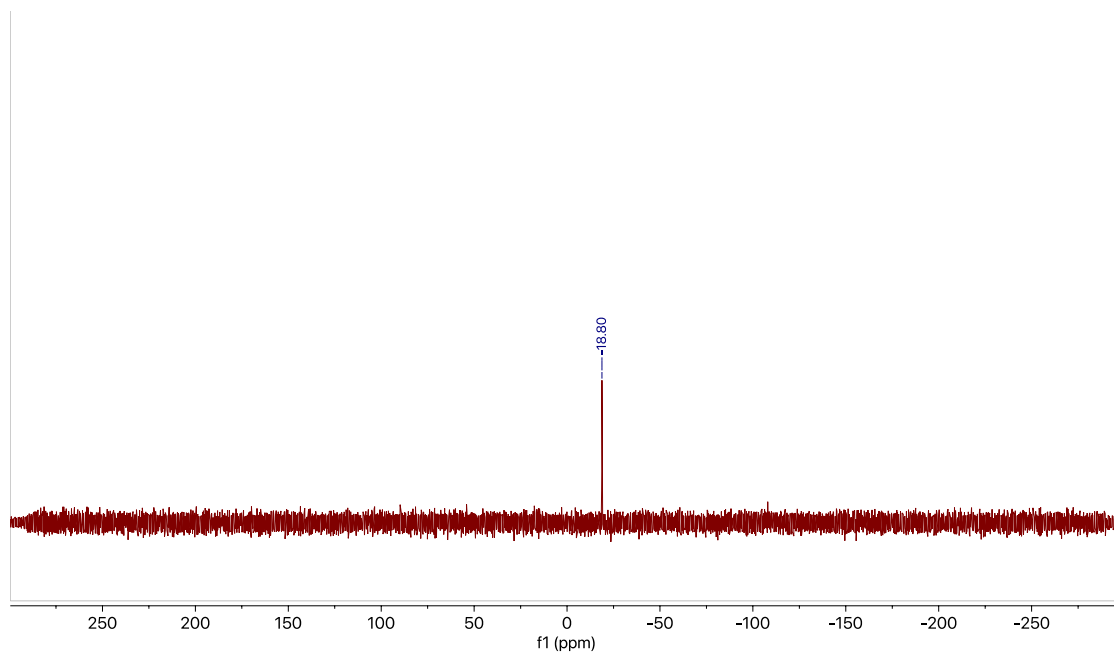

**Figure S13.**  $^{29}\text{Si}\{^1\text{H}\}$  NMR spectrum of **9** in  $\text{C}_6\text{D}_6$ .

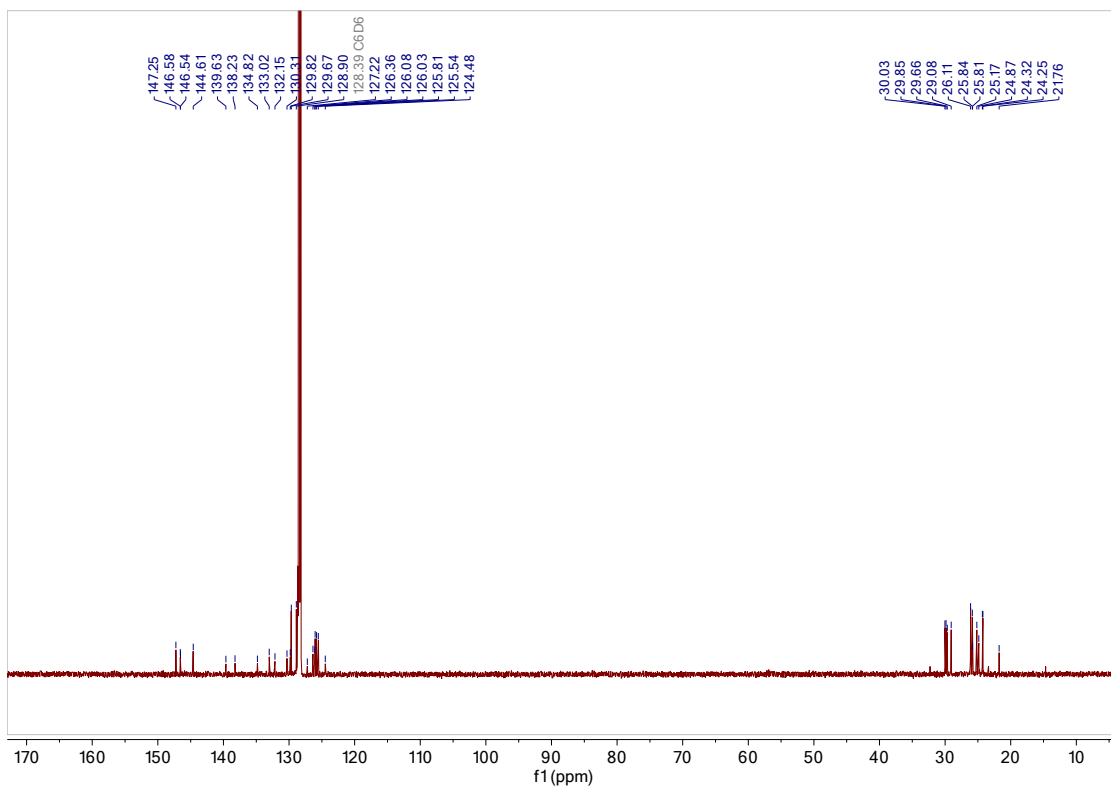

Figure S14.  $^{13}\text{C}\{^1\text{H}\}$  NMR spectrum of **9** in  $\text{C}_6\text{D}_6$ .

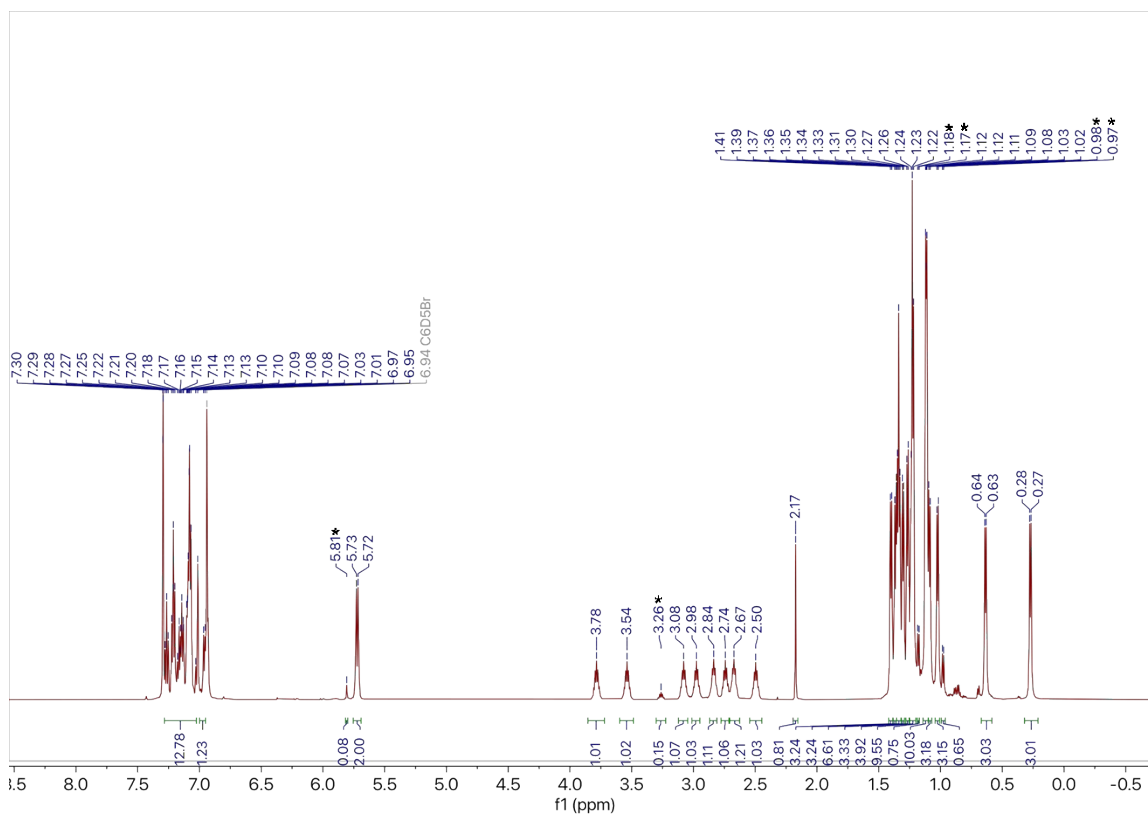

Figure S15.  $^1\text{H}$  NMR spectrum of **10** in  $\text{C}_6\text{D}_5\text{Br}$ , \* resonances of the impurity (4%).

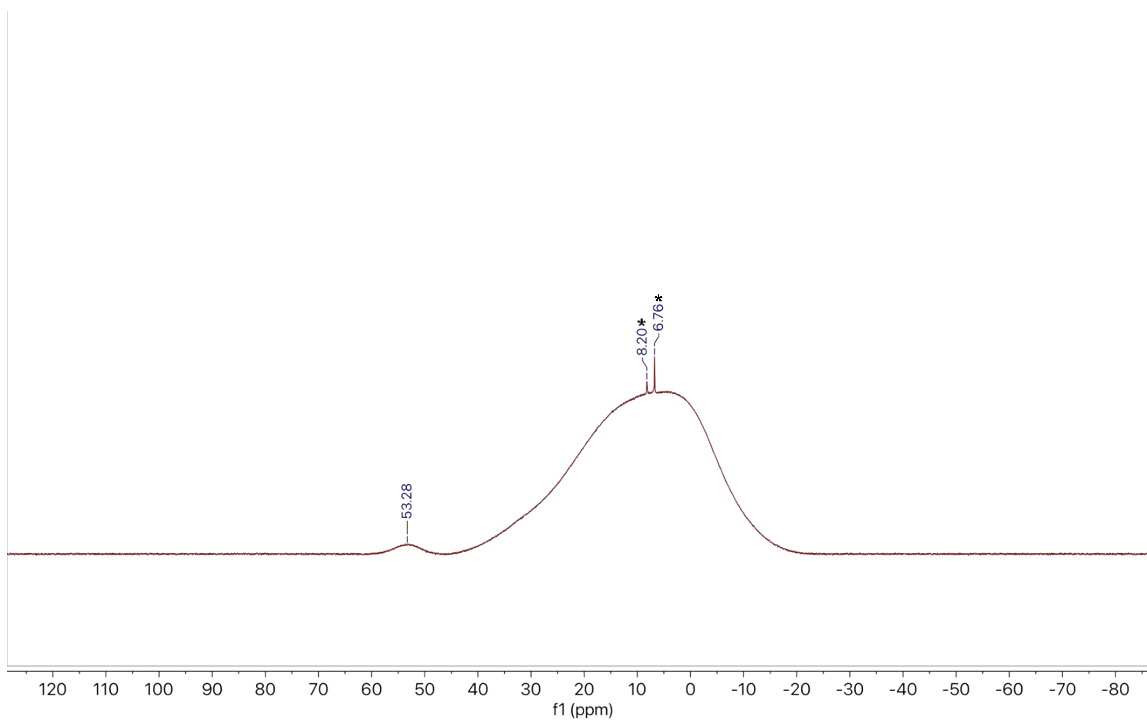

**Figure S16.**  $^{11}\text{B}$  NMR spectrum of **10** in  $\text{C}_6\text{D}_5\text{Br}$  (\* resonances of impurities).

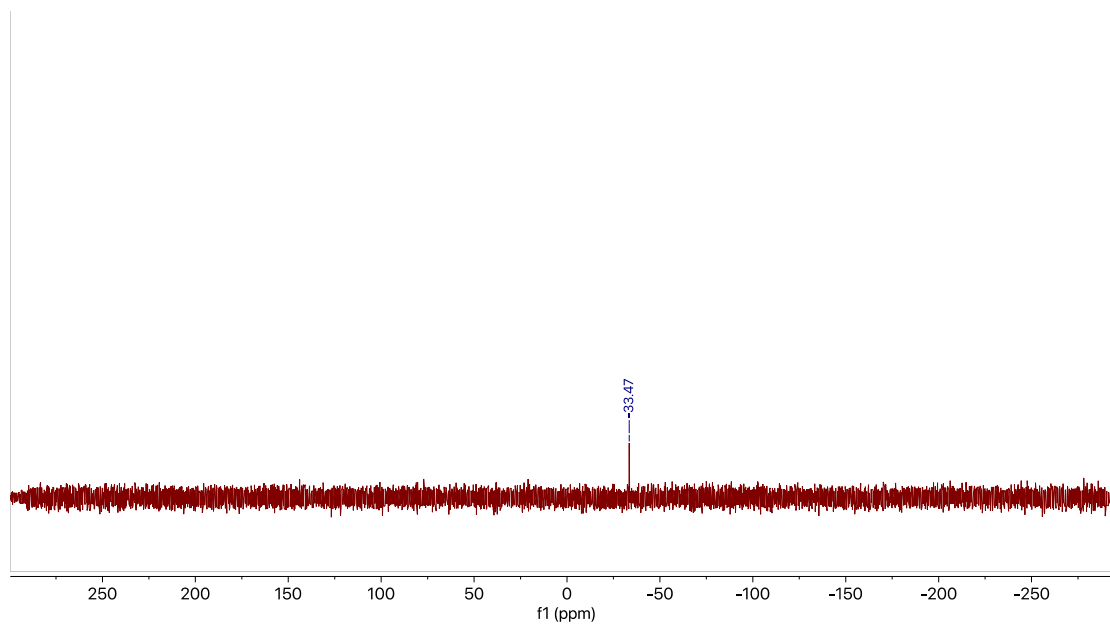

**Figure S17.**  $^{29}\text{Si}\{^1\text{H}\}$  NMR spectrum of **10** in  $\text{C}_6\text{D}_5\text{Br}$ .

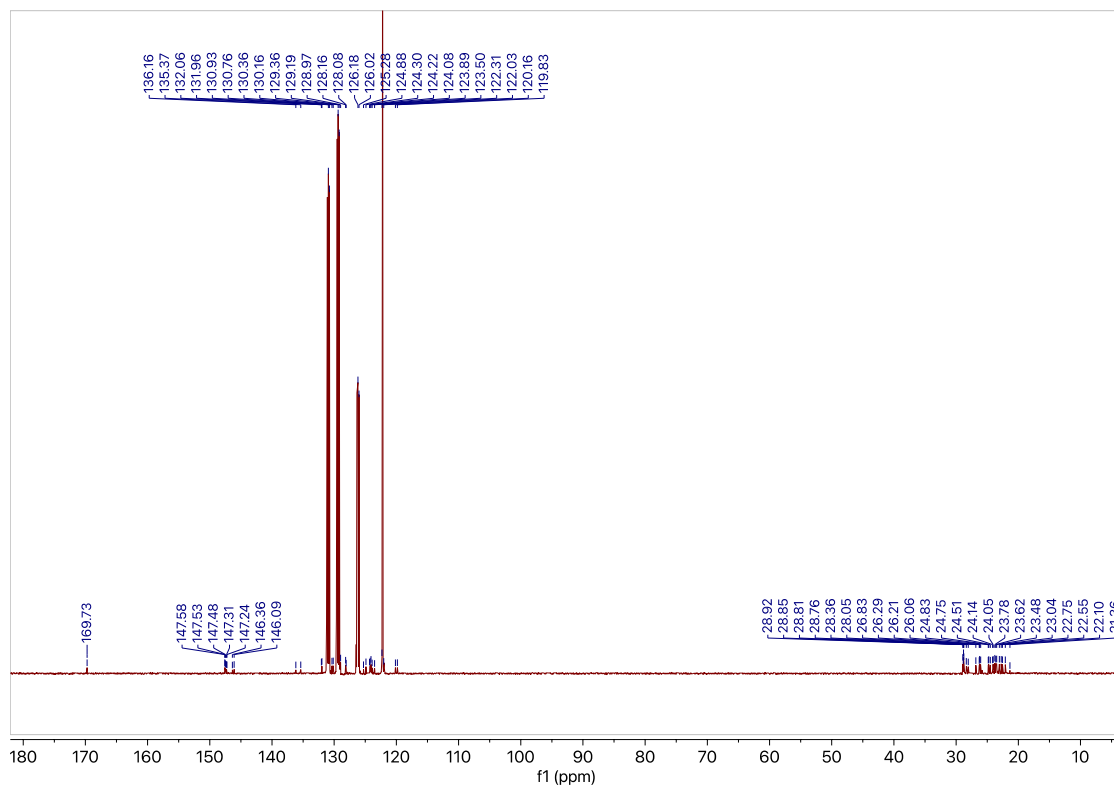

Figure S18.  $^{13}\text{C}\{^1\text{H}\}$  NMR spectrum of **10** in  $\text{C}_6\text{D}_5\text{Br}$ .

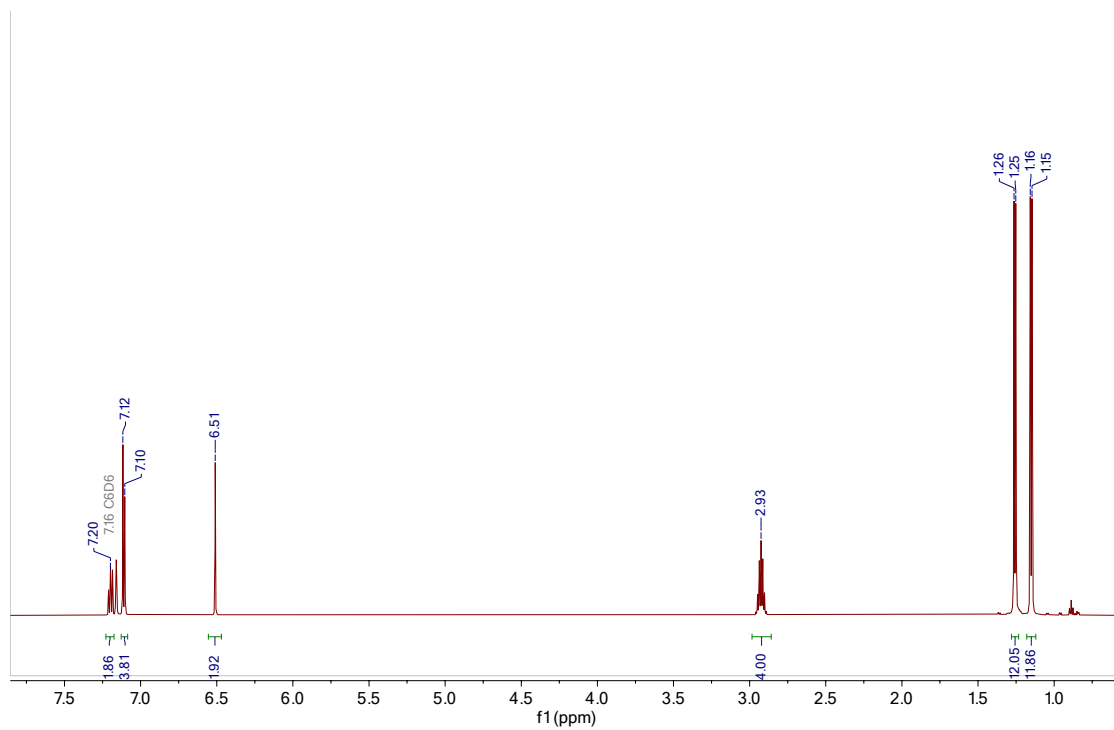

Figure S19.  $^1\text{H}$  NMR spectrum of **12** in  $\text{C}_6\text{D}_6$ .

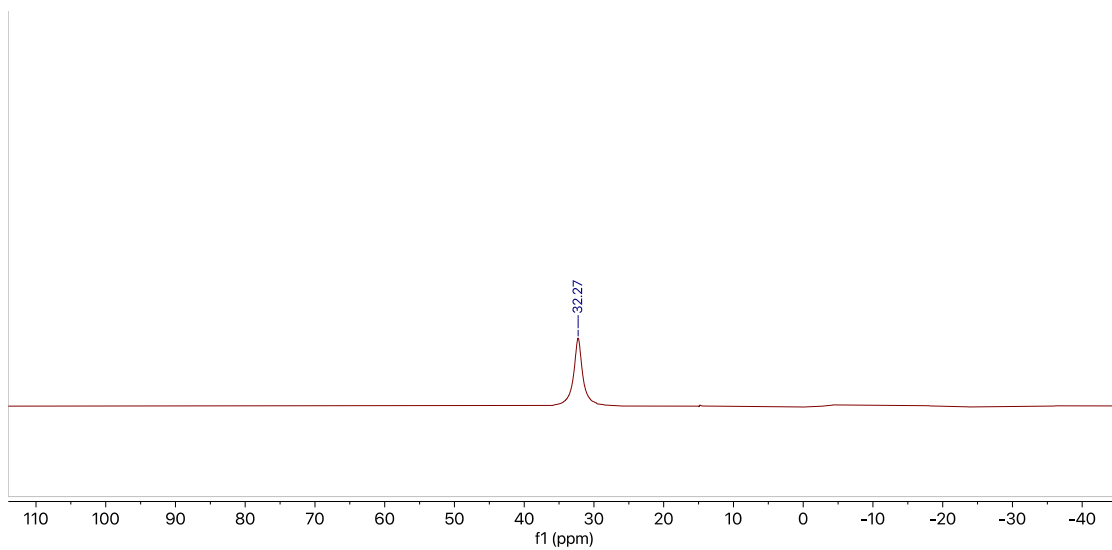

**Figure S20.**  $^{11}\text{B}$  NMR spectrum of **12** in  $\text{C}_6\text{D}_6$ .

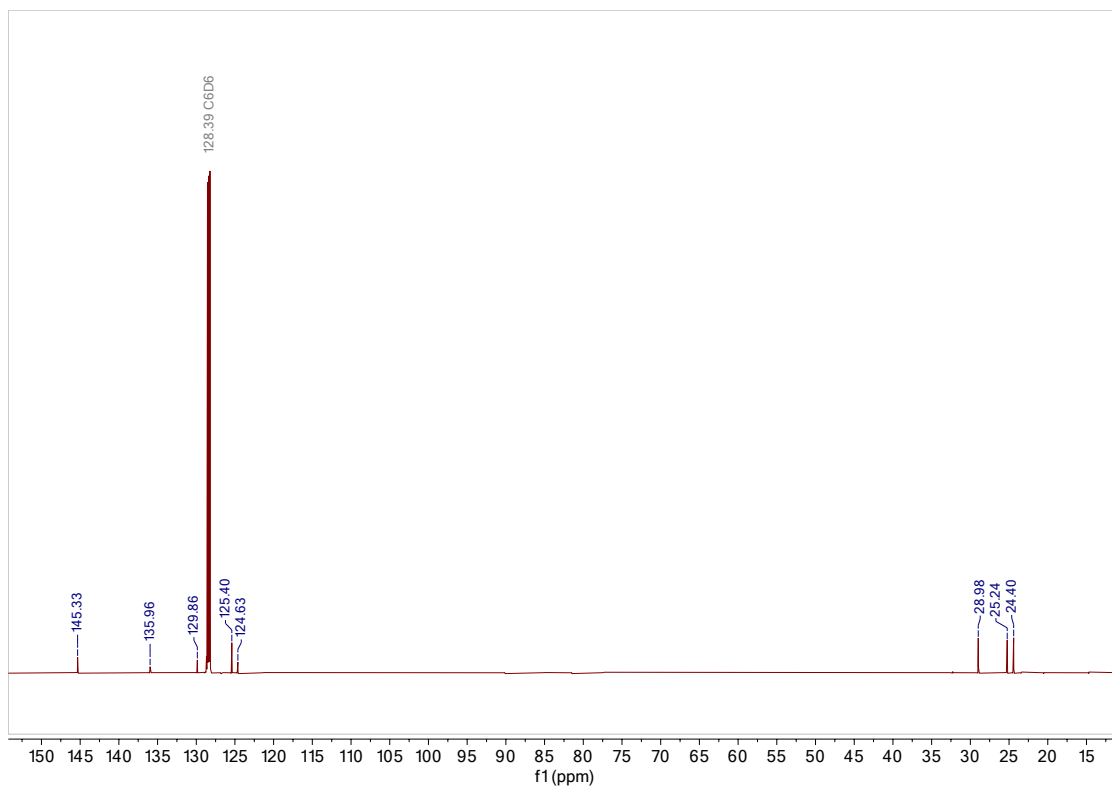

**Figure S21.**  $^{13}\text{C}\{^1\text{H}\}$  NMR spectrum of **12** in  $\text{C}_6\text{D}_6$ .

## SUPPORTING INFORMATION of COMPUTATIONS

All computations employed the Gaussian 16 (Revision C.01) program:

Gaussian 16, Revision C.01,  
M. J. Frisch, G. W. Trucks, H. B. Schlegel, G. E. Scuseria,  
M. A. Robb, J. R. Cheeseman, G. Scalmani, V. Barone,  
G. A. Petersson, H. Nakatsuji, X. Li, M. Caricato, A. V. Marenich,  
J. Bloino, B. G. Janesko, R. Gomperts, B. Mennucci, H. P. Hratchian,  
J. V. Ortiz, A. F. Izmaylov, J. L. Sonnenberg, D. Williams-Young,  
F. Ding, F. Lipparini, F. Egidi, J. Goings, B. Peng, A. Petrone,  
T. Henderson, D. Ranasinghe, V. G. Zakrzewski, J. Gao, N. Rega,  
G. Zheng, W. Liang, M. Hada, M. Ehara, K. Toyota, R. Fukuda,  
J. Hasegawa, M. Ishida, T. Nakajima, Y. Honda, O. Kitao, H. Nakai,  
T. Vreven, K. Throssell, J. A. Montgomery, Jr., J. E. Peralta,  
F. Ogliaro, M. J. Bearpark, J. J. Heyd, E. N. Brothers, K. N. Kudin,  
V. N. Staroverov, T. A. Keith, R. Kobayashi, J. Normand,  
K. Raghavachari, A. P. Rendell, J. C. Burant, S. S. Iyengar,  
J. Tomasi, M. Cossi, J. M. Millam, M. Klene, C. Adamo, R. Cammi,  
J. W. Ochterski, R. L. Martin, K. Morokuma, O. Farkas,  
J. B. Foresman, and D. J. Fox, Gaussian, Inc., Wallingford CT, 2019.



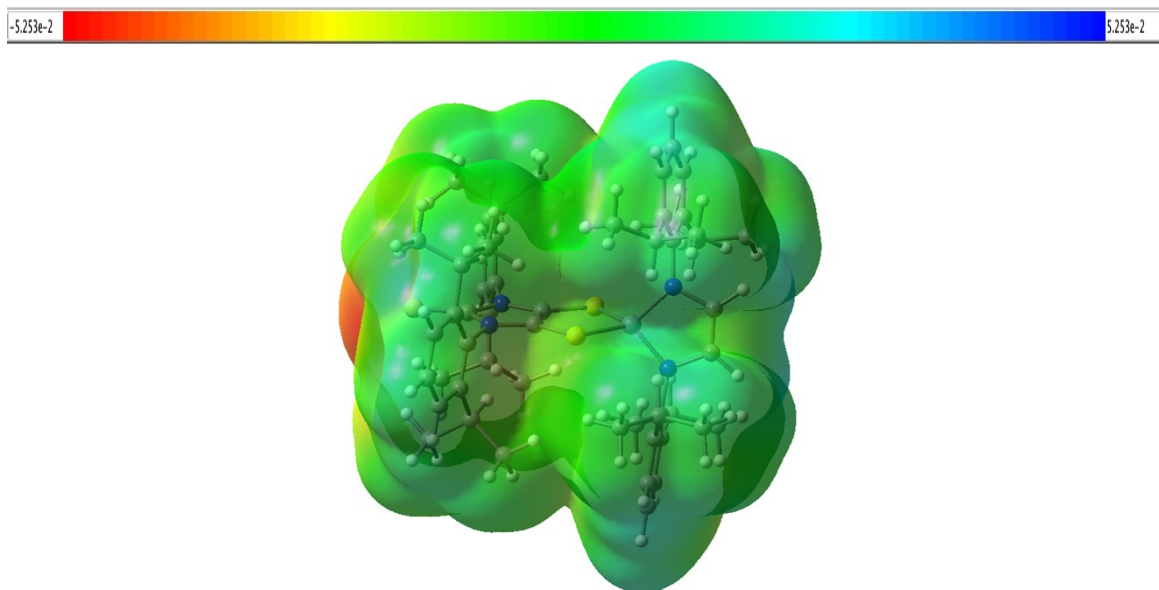

**Figure S22.** The electrostatic potential map of **4** at B3LYP/6-311G\*\* level of theory.

**Table S1.** Coordinates of the B3LYP/6-311G\*\* geometry of **5-Ph**.

| Center<br>Number | Atomic<br>Number | Atomic<br>Type | Coordinates (Angstroms) |           |           |
|------------------|------------------|----------------|-------------------------|-----------|-----------|
|                  |                  |                | X                       | Y         | Z         |
| 1                | 14               | 0              | -1.898039               | -0.066705 | 0.764901  |
| 2                | 16               | 0              | 4.578433                | 1.358503  | 0.176463  |
| 3                | 16               | 0              | -0.254635               | -0.735732 | 2.012058  |
| 4                | 16               | 0              | -0.891079               | 1.093026  | -0.764474 |
| 5                | 5                | 0              | 5.462266                | -0.303617 | -0.585968 |
| 6                | 5                | 0              | -5.408021               | -0.413229 | -0.582601 |
| 7                | 35               | 0              | 4.043075                | -1.593299 | -1.316906 |
| 8                | 35               | 0              | 6.561300                | -1.191365 | 0.855730  |
| 9                | 35               | 0              | 6.638412                | 0.398286  | -2.071896 |
| 10               | 35               | 0              | -5.679470               | -2.040468 | -1.725383 |
| 11               | 35               | 0              | -7.205291               | 0.261574  | 0.141091  |
| 12               | 35               | 0              | -4.443330               | 1.072733  | -1.639734 |
| 13               | 7                | 0              | 2.320995                | 0.193416  | 1.313256  |
| 14               | 7                | 0              | 1.908401                | 1.368791  | -0.487625 |
| 15               | 7                | 0              | -3.070440               | -1.267027 | 0.473862  |
| 16               | 7                | 0              | -3.141289               | 0.963333  | 1.624772  |
| 17               | 6                | 0              | 2.908631                | 0.940434  | 0.336044  |
| 18               | 6                | 0              | 0.955817                | 0.138364  | 1.083341  |
| 19               | 6                | 0              | 0.696794                | 0.873095  | -0.032767 |
| 20               | 6                | 0              | 2.061949                | 2.212632  | -1.652046 |
| 21               | 6                | 0              | 2.652332                | 1.700488  | -2.802484 |
| 22               | 6                | 0              | 2.770093                | 2.526479  | -3.916772 |
| 23               | 1                | 0              | 3.239804                | 2.142445  | -4.813932 |
| 24               | 6                | 0              | 2.294900                | 3.835508  | -3.877155 |
| 25               | 1                | 0              | 2.390042                | 4.471642  | -4.749324 |
| 26               | 6                | 0              | 1.702357                | 4.331745  | -2.717642 |
| 27               | 1                | 0              | 1.337317                | 5.351183  | -2.683496 |
| 28               | 6                | 0              | 1.585427                | 3.519897  | -1.593269 |
| 29               | 6                | 0              | 2.981201                | -0.428216 | 2.438309  |
| 30               | 6                | 0              | 3.130680                | -1.810521 | 2.455820  |
| 31               | 6                | 0              | 3.725603                | -2.406772 | 3.564234  |
| 32               | 1                | 0              | 3.860295                | -3.481201 | 3.583392  |
| 33               | 6                | 0              | 4.168904                | -1.624452 | 4.627126  |
| 34               | 1                | 0              | 4.642451                | -2.092947 | 5.481878  |
| 35               | 6                | 0              | 4.019179                | -0.239014 | 4.590008  |
| 36               | 1                | 0              | 4.375120                | 0.370487  | 5.411857  |
| 37               | 6                | 0              | 3.417282                | 0.368350  | 3.493151  |
| 38               | 6                | 0              | -4.434241               | -0.815719 | 0.774962  |
| 39               | 1                | 0              | -5.026724               | -1.571657 | 1.296813  |
| 40               | 6                | 0              | -4.323476               | 0.404706  | 1.549616  |
| 41               | 1                | 0              | -5.194175               | 0.895572  | 1.967097  |
| 42               | 6                | 0              | -2.951879               | 2.288665  | 2.161521  |
| 43               | 6                | 0              | -3.720572               | 3.341226  | 1.664756  |
| 44               | 6                | 0              | -3.540800               | 4.617529  | 2.190754  |
| 45               | 1                | 0              | -4.134458               | 5.438964  | 1.808109  |
| 46               | 6                | 0              | -2.597599               | 4.839084  | 3.191920  |
| 47               | 1                | 0              | -2.460392               | 5.834908  | 3.596284  |
| 48               | 6                | 0              | -1.828203               | 3.780680  | 3.671797  |
| 49               | 1                | 0              | -1.097748               | 3.949087  | 4.454070  |
| 50               | 6                | 0              | -1.998941               | 2.498440  | 3.157572  |
| 51               | 6                | 0              | -2.784988               | -2.607389 | 0.053006  |
| 52               | 6                | 0              | -3.221239               | -3.691750 | 0.818316  |
| 53               | 6                | 0              | -2.903659               | -4.988471 | 0.429230  |
| 54               | 1                | 0              | -3.253681               | -5.825177 | 1.022645  |
| 55               | 6                | 0              | -2.129003               | -5.212485 | -0.707825 |
| 56               | 1                | 0              | -1.877794               | -6.223810 | -1.004704 |
| 57               | 6                | 0              | -1.683101               | -4.130430 | -1.461388 |
| 58               | 1                | 0              | -1.088286               | -4.294454 | -2.352194 |
| 59               | 6                | 0              | -2.018283               | -2.830541 | -1.091245 |
| 60               | 1                | 0              | -1.417613               | 1.669200  | 3.540279  |
| 61               | 1                | 0              | -4.425376               | 3.162666  | 0.861353  |
| 62               | 1                | 0              | -3.802847               | -3.523199 | 1.717283  |
| 63               | 1                | 0              | -1.716327               | -1.992327 | -1.707206 |
| 64               | 1                | 0              | 1.138757                | 3.895539  | -0.680511 |
| 65               | 1                | 0              | 3.024311                | 0.684133  | -2.814518 |
| 66               | 1                | 0              | 2.817057                | -2.399291 | 1.603755  |
| 67               | 1                | 0              | 3.299125                | 1.443559  | 3.445736  |

**Table S2.** Coordinates of the B3LYP/6-311G\*\* geometry of **6** (in  $C_{2h}$  symmetry).

| Center<br>Number | Atomic<br>Number | Atomic<br>Type | Coordinates (Angstroms) |           |           |
|------------------|------------------|----------------|-------------------------|-----------|-----------|
|                  |                  |                | X                       | Y         | Z         |
| 1                | 35               | 0              | -4.724339               | 0.911088  | -0.000017 |
| 2                | 35               | 0              | -2.293473               | 3.148450  | -0.000010 |
| 3                | 5                | 0              | -2.816248               | 1.269985  | -0.000006 |
| 4                | 7                | 0              | -1.864929               | 0.232116  | 0.000000  |
| 5                | 6                | 0              | -0.468045               | 0.479345  | -0.000001 |
| 6                | 1                | 0              | -0.201902               | 1.524664  | -0.000014 |
| 7                | 6                | 0              | -2.286547               | -1.165326 | 0.000007  |
| 8                | 6                | 0              | -2.472814               | -1.821185 | 1.232034  |
| 9                | 6                | 0              | -2.882502               | -3.157324 | 1.201835  |
| 10               | 1                | 0              | -3.042029               | -3.684605 | 2.135267  |
| 11               | 6                | 0              | -3.089810               | -3.820628 | 0.000018  |
| 12               | 1                | 0              | -3.409730               | -4.856679 | 0.000023  |
| 13               | 6                | 0              | -2.882494               | -3.157337 | -1.201805 |
| 14               | 1                | 0              | -3.042014               | -3.684627 | -2.135232 |
| 15               | 6                | 0              | -2.472805               | -1.821199 | -1.232014 |
| 16               | 6                | 0              | -2.251572               | -1.139707 | -2.578958 |
| 17               | 1                | 0              | -1.909514               | -0.120845 | -2.389872 |
| 18               | 6                | 0              | -1.152609               | -1.843952 | -3.397287 |
| 19               | 1                | 0              | -0.214992               | -1.903109 | -2.840140 |
| 20               | 1                | 0              | -1.444904               | -2.862257 | -3.668640 |
| 21               | 1                | 0              | -0.963334               | -1.295950 | -4.324753 |
| 22               | 6                | 0              | -3.558360               | -1.044328 | -3.389734 |
| 23               | 1                | 0              | -4.337826               | -0.524898 | -2.829242 |
| 24               | 1                | 0              | -3.386095               | -0.498036 | -4.321656 |
| 25               | 1                | 0              | -3.936868               | -2.036569 | -3.651677 |
| 26               | 6                | 0              | -2.251593               | -1.139679 | 2.578973  |
| 27               | 1                | 0              | -1.909531               | -0.120819 | 2.389879  |
| 28               | 6                | 0              | -1.152637               | -1.843917 | 3.397319  |
| 29               | 1                | 0              | -0.215015               | -1.903076 | 2.840182  |
| 30               | 1                | 0              | -0.963373               | -1.295908 | 4.324782  |
| 31               | 1                | 0              | -1.444933               | -2.862220 | 3.668676  |
| 32               | 6                | 0              | -3.558388               | -1.044291 | 3.389736  |
| 33               | 1                | 0              | -3.386132               | -0.497986 | 4.321651  |
| 34               | 1                | 0              | -4.337850               | -0.524869 | 2.829230  |
| 35               | 1                | 0              | -3.936897               | -2.036530 | 3.651689  |
| 36               | 35               | 0              | 4.724339                | -0.911087 | 0.000009  |
| 37               | 35               | 0              | 2.293474                | -3.148451 | 0.000013  |
| 38               | 5                | 0              | 2.816248                | -1.269985 | 0.000011  |
| 39               | 7                | 0              | 1.864929                | -0.232116 | 0.000007  |
| 40               | 6                | 0              | 0.468045                | -0.479346 | 0.000011  |
| 41               | 1                | 0              | 0.201902                | -1.524665 | 0.000023  |
| 42               | 6                | 0              | 2.286547                | 1.165326  | -0.000004 |
| 43               | 6                | 0              | 2.472809                | 1.821181  | -1.232033 |
| 44               | 6                | 0              | 2.882497                | 3.157320  | -1.201841 |
| 45               | 1                | 0              | 3.042019                | 3.684597  | -2.135276 |
| 46               | 6                | 0              | 3.089809                | 3.820628  | -0.000027 |
| 47               | 1                | 0              | 3.409729                | 4.856679  | -0.000036 |
| 48               | 6                | 0              | 2.882498                | 3.157340  | 1.201799  |
| 49               | 1                | 0              | 3.042022                | 3.684634  | 2.135224  |
| 50               | 6                | 0              | 2.472809                | 1.821202  | 1.232015  |
| 51               | 6                | 0              | 2.251582                | 1.139715  | 2.578962  |
| 52               | 1                | 0              | 1.909521                | 0.120853  | 2.389882  |
| 53               | 6                | 0              | 1.152624                | 1.843967  | 3.397294  |
| 54               | 1                | 0              | 0.215005                | 1.903123  | 2.840151  |
| 55               | 1                | 0              | 1.444923                | 2.862272  | 3.668641  |
| 56               | 1                | 0              | 0.963353                | 1.295969  | 4.324762  |
| 57               | 6                | 0              | 3.558374                | 1.044338  | 3.389732  |
| 58               | 1                | 0              | 4.337836                | 0.524904  | 2.829238  |
| 59               | 1                | 0              | 3.386113                | 0.498050  | 4.321657  |
| 60               | 1                | 0              | 3.936885                | 2.036580  | 3.651670  |
| 61               | 6                | 0              | 2.251581                | 1.139670  | -2.578969 |
| 62               | 1                | 0              | 1.909522                | 0.120810  | -2.389869 |
| 63               | 6                | 0              | 1.152621                | 1.843904  | -3.397312 |
| 64               | 1                | 0              | 0.215001                | 1.903064  | -2.840171 |
| 65               | 1                | 0              | 0.963353                | 1.295891  | -4.324772 |
| 66               | 1                | 0              | 1.444915                | 2.862206  | -3.668674 |
| 67               | 6                | 0              | 3.558373                | 1.044280  | -3.389738 |
| 68               | 1                | 0              | 3.386113                | 0.497971  | -4.321651 |
| 69               | 1                | 0              | 4.337838                | 0.524861  | -2.829234 |
| 70               | 1                | 0              | 3.936880                | 2.036517  | -3.651697 |

**Table S3.** Coordinates of the B3LYP/6-311G\*\* geometry of 7.

| Center<br>Number | Atomic<br>Number | Atomic<br>Type | Coordinates (Angstroms) |           |           |
|------------------|------------------|----------------|-------------------------|-----------|-----------|
|                  |                  |                | X                       | Y         | Z         |
| 1                | 5                | 0              | -4.361310               | -0.649555 | -0.503966 |
| 2                | 5                | 0              | 3.200403                | 0.179099  | -0.146038 |
| 3                | 35               | 0              | -6.218388               | -1.031461 | -0.774598 |
| 4                | 35               | 0              | 3.781714                | -1.705331 | 0.294418  |
| 5                | 35               | 0              | 2.829729                | 0.413235  | -2.127081 |
| 6                | 35               | 0              | 4.571890                | 1.515790  | 0.523344  |
| 7                | 16               | 0              | 1.619915                | 0.769405  | 0.943509  |
| 8                | 16               | 0              | -3.124297               | -1.969836 | -0.317957 |
| 9                | 16               | 0              | -3.729539               | 1.055900  | -0.427546 |
| 10               | 7                | 0              | -0.466891               | -0.978713 | 0.136852  |
| 11               | 7                | 0              | -0.910739               | 1.184906  | 0.077570  |
| 12               | 6                | 0              | 0.086691                | 0.266486  | 0.298303  |
| 13               | 6                | 0              | -1.812787               | -0.821238 | -0.157638 |
| 14               | 6                | 0              | -2.085209               | 0.509100  | -0.191885 |
| 15               | 6                | 0              | -0.835459               | 2.632770  | 0.219525  |
| 16               | 6                | 0              | -1.101401               | 3.187794  | 1.485364  |
| 17               | 6                | 0              | -1.104366               | 4.581296  | 1.583236  |
| 18               | 1                | 0              | -1.297582               | 5.044855  | 2.543156  |
| 19               | 6                | 0              | -0.862412               | 5.379813  | 0.474367  |
| 20               | 1                | 0              | -0.870762               | 6.459416  | 0.573294  |
| 21               | 6                | 0              | -0.603054               | 4.800535  | -0.760126 |
| 22               | 1                | 0              | -0.407950               | 5.436096  | -1.614421 |
| 23               | 6                | 0              | -0.578381               | 3.412628  | -0.923104 |
| 24               | 6                | 0              | -0.298200               | 2.817581  | -2.298410 |
| 25               | 1                | 0              | -0.038086               | 1.765562  | -2.166653 |
| 26               | 6                | 0              | 0.904559                | 3.485662  | -2.987272 |
| 27               | 1                | 0              | 1.147528                | 2.946161  | -3.905691 |
| 28               | 1                | 0              | 0.690207                | 4.522065  | -3.262913 |
| 29               | 1                | 0              | 1.789027                | 3.468389  | -2.349816 |
| 30               | 6                | 0              | -1.546480               | 2.892643  | -3.201182 |
| 31               | 1                | 0              | -1.336742               | 2.434764  | -4.171772 |
| 32               | 1                | 0              | -2.403254               | 2.375751  | -2.763306 |
| 33               | 1                | 0              | -1.839259               | 3.932033  | -3.376763 |
| 34               | 6                | 0              | -1.377233               | 2.354604  | 2.732758  |
| 35               | 1                | 0              | -1.316701               | 1.298126  | 2.462724  |
| 36               | 6                | 0              | -2.797564               | 2.602157  | 3.276851  |
| 37               | 1                | 0              | -2.990570               | 1.954382  | 4.136506  |
| 38               | 1                | 0              | -2.921575               | 3.636846  | 3.607362  |
| 39               | 1                | 0              | -3.559879               | 2.399347  | 2.521075  |
| 40               | 6                | 0              | -0.317686               | 2.604707  | 3.822857  |
| 41               | 1                | 0              | -0.495973               | 1.946907  | 4.678149  |
| 42               | 1                | 0              | 0.689550                | 2.414599  | 3.448942  |
| 43               | 1                | 0              | -0.356482               | 3.635492  | 4.185178  |
| 44               | 6                | 0              | 0.112732                | -2.293074 | 0.394145  |
| 45               | 6                | 0              | 0.175050                | -2.731276 | 1.730787  |
| 46               | 6                | 0              | 0.624559                | -4.034243 | 1.954424  |
| 47               | 1                | 0              | 0.696691                | -4.401844 | 2.970799  |
| 48               | 6                | 0              | 0.971922                | -4.866252 | 0.900103  |
| 49               | 1                | 0              | 1.313181                | -5.876167 | 1.097607  |
| 50               | 6                | 0              | 0.891136                | -4.406512 | -0.406045 |
| 51               | 1                | 0              | 1.178565                | -5.062138 | -1.217998 |
| 52               | 6                | 0              | 0.468805                | -3.107156 | -0.699286 |
| 53               | 6                | 0              | 0.425272                | -2.653993 | -2.157105 |
| 54               | 1                | 0              | 0.327129                | -1.566224 | -2.171721 |
| 55               | 6                | 0              | 1.727158                | -2.997958 | -2.905819 |
| 56               | 1                | 0              | 2.606007                | -2.652766 | -2.363669 |
| 57               | 1                | 0              | 1.818795                | -4.075310 | -3.071641 |
| 58               | 1                | 0              | 1.722980                | -2.515245 | -3.886213 |
| 59               | 6                | 0              | -0.775948               | -3.260270 | -2.911298 |
| 60               | 1                | 0              | -0.778777               | -2.912213 | -3.948042 |
| 61               | 1                | 0              | -0.712998               | -4.352312 | -2.926887 |
| 62               | 1                | 0              | -1.732968               | -2.989317 | -2.464022 |
| 63               | 6                | 0              | -0.238280               | -1.878672 | 2.925549  |
| 64               | 1                | 0              | -0.490235               | -0.879607 | 2.567040  |
| 65               | 6                | 0              | 0.914881                | -1.713488 | 3.932444  |
| 66               | 1                | 0              | 0.618779                | -1.029210 | 4.732542  |
| 67               | 1                | 0              | 1.180496                | -2.667337 | 4.396017  |
| 68               | 1                | 0              | 1.805610                | -1.310941 | 3.448249  |
| 69               | 6                | 0              | -1.496734               | -2.448761 | 3.609245  |
| 70               | 1                | 0              | -1.807462               | -1.799330 | 4.432715  |
| 71               | 1                | 0              | -2.332293               | -2.534366 | 2.909830  |
| 72               | 1                | 0              | -1.306847               | -3.442499 | 4.023688  |

**Table S4.** Coordinates of the mPW1PW91/LANL2DZ geometry of **8-Ph.**

| Center<br>Number | Atomic<br>Number | Atomic<br>Type | Coordinates (Angstroms) |           |           |
|------------------|------------------|----------------|-------------------------|-----------|-----------|
|                  |                  |                | X                       | Y         | Z         |
| 1                | 14               | 0              | -1.971962               | 0.110272  | 0.888956  |
| 2                | 16               | 0              | 4.666882                | 1.540215  | 0.349441  |
| 3                | 16               | 0              | -0.253799               | -0.546686 | 2.194257  |
| 4                | 16               | 0              | -0.885018               | 1.334330  | -0.647631 |
| 5                | 5                | 0              | 5.548426                | -0.184280 | -0.392153 |
| 6                | 5                | 0              | -5.472679               | -0.445538 | -0.329589 |
| 7                | 53               | 0              | 3.946714                | -1.640265 | -1.136056 |
| 8                | 53               | 0              | 6.792924                | -1.109783 | 1.234424  |
| 9                | 53               | 0              | 6.827055                | 0.542701  | -2.107780 |
| 10               | 53               | 0              | -7.475173               | 0.376369  | 0.431398  |
| 11               | 53               | 0              | -4.388403               | 1.110891  | -1.621066 |
| 12               | 53               | 0              | -5.827169               | -2.329746 | -1.485866 |
| 13               | 7                | 0              | 2.347235                | 0.395015  | 1.483219  |
| 14               | 7                | 0              | 1.950987                | 1.578478  | -0.331527 |
| 15               | 7                | 0              | -3.103777               | -1.175576 | 0.720206  |
| 16               | 7                | 0              | -3.239548               | 1.119004  | 1.749898  |
| 17               | 6                | 0              | 2.949619                | 1.135107  | 0.498926  |
| 18               | 6                | 0              | 0.976970                | 0.349667  | 1.245879  |
| 19               | 6                | 0              | 0.728348                | 1.092144  | 0.123395  |
| 20               | 6                | 0              | 2.113310                | 2.431008  | -1.486481 |
| 21               | 6                | 0              | 2.904890                | 2.010109  | -2.559852 |
| 22               | 6                | 0              | 3.038448                | 2.854105  | -3.669322 |
| 23               | 1                | 0              | 3.659304                | 2.541042  | -4.500353 |
| 24               | 6                | 0              | 2.379012                | 4.091155  | -3.703612 |
| 25               | 1                | 0              | 2.485660                | 4.737870  | -4.567449 |
| 26               | 6                | 0              | 1.584506                | 4.495585  | -2.620158 |
| 27               | 1                | 0              | 1.077353                | 5.453418  | -2.642318 |
| 28               | 6                | 0              | 1.451963                | 3.666676  | -1.500105 |
| 29               | 6                | 0              | 3.003345                | -0.232794 | 2.605239  |
| 30               | 6                | 0              | 2.935101                | -1.623985 | 2.740030  |
| 31               | 6                | 0              | 3.538136                | -2.224288 | 3.851768  |
| 32               | 1                | 0              | 3.504977                | -3.302052 | 3.960275  |
| 33               | 6                | 0              | 4.203698                | -1.439095 | 4.803342  |
| 34               | 1                | 0              | 4.680901                | -1.910546 | 5.655293  |
| 35               | 6                | 0              | 4.269397                | -0.046399 | 4.647276  |
| 36               | 1                | 0              | 4.796858                | 0.559368  | 5.375085  |
| 37               | 6                | 0              | 3.662794                | 0.567246  | 3.545854  |
| 38               | 6                | 0              | -4.480075               | -0.769630 | 1.032712  |
| 39               | 1                | 0              | -5.039903               | -1.538370 | 1.573948  |
| 40               | 6                | 0              | -4.401077               | 0.487762  | 1.772411  |
| 41               | 1                | 0              | -5.267847               | 0.929548  | 2.248379  |
| 42               | 6                | 0              | -3.066938               | 2.468949  | 2.218816  |
| 43               | 6                | 0              | -4.039658               | 3.432825  | 1.910347  |
| 44               | 6                | 0              | -3.870269               | 4.743380  | 2.371778  |
| 45               | 1                | 0              | -4.615515               | 5.493544  | 2.133719  |
| 46               | 6                | 0              | -2.735054               | 5.088804  | 3.119907  |
| 47               | 1                | 0              | -2.606266               | 6.106103  | 3.471702  |
| 48               | 6                | 0              | -1.763310               | 4.118590  | 3.407721  |
| 49               | 1                | 0              | -0.886855               | 4.382899  | 3.988474  |
| 50               | 6                | 0              | -1.921480               | 2.803091  | 2.955839  |
| 51               | 6                | 0              | -2.751126               | -2.499384 | 0.304884  |
| 52               | 6                | 0              | -3.212738               | -3.617734 | 1.019393  |
| 53               | 6                | 0              | -2.809331               | -4.900759 | 0.634405  |
| 54               | 1                | 0              | -3.175259               | -5.762786 | 1.181528  |
| 55               | 6                | 0              | -1.928208               | -5.075582 | -0.443886 |
| 56               | 1                | 0              | -1.614924               | -6.071729 | -0.735458 |
| 57               | 6                | 0              | -1.460497               | -3.956132 | -1.145400 |
| 58               | 1                | 0              | -0.787918               | -4.081994 | -1.986623 |
| 59               | 6                | 0              | -1.875236               | -2.669975 | -0.778856 |
| 60               | 1                | 0              | 3.403882                | 1.049023  | -2.532600 |
| 61               | 1                | 0              | 0.855720                | 3.979930  | -0.649890 |
| 62               | 1                | 0              | 3.715987                | 1.640664  | 3.408635  |
| 63               | 1                | 0              | 2.452067                | -2.224350 | 1.978494  |
| 64               | 1                | 0              | -1.184924               | 2.046806  | 3.204612  |
| 65               | 1                | 0              | -4.891732               | 3.172840  | 1.290757  |
| 66               | 1                | 0              | -3.874930               | -3.492259 | 1.869215  |
| 67               | 1                | 0              | -1.563721               | -1.809357 | -1.363117 |

**Table S5.** Coordinates of the mPW1PW91/LANL2DZ geometry of **9-Ph**.

| Center<br>Number | Atomic<br>Number | Atomic<br>Type | Coordinates (Angstroms) |           |           |
|------------------|------------------|----------------|-------------------------|-----------|-----------|
|                  |                  |                | X                       | Y         | Z         |
| 1                | 53               | 0              | -7.228593               | -1.104678 | 1.520224  |
| 2                | 53               | 0              | -6.550760               | -1.094208 | -2.146540 |
| 3                | 53               | 0              | -5.060904               | 1.558612  | 0.032249  |
| 4                | 53               | 0              | 0.853050                | 4.650568  | 0.182969  |
| 5                | 53               | 0              | 8.167792                | -0.090787 | -0.319559 |
| 6                | 53               | 0              | 7.160660                | -3.639027 | -0.090604 |
| 7                | 14               | 0              | 1.303380                | 2.200407  | 0.133511  |
| 8                | 16               | 0              | -4.141541               | -1.893856 | 0.274954  |
| 9                | 16               | 0              | 0.352829                | 1.104075  | 1.883848  |
| 10               | 16               | 0              | 0.238838                | 1.158417  | -1.586080 |
| 11               | 5                | 0              | -5.730768               | -0.624030 | -0.106136 |
| 12               | 5                | 0              | 6.577162                | -1.555396 | -0.111044 |
| 13               | 7                | 0              | -1.982926               | -0.432982 | 1.299841  |
| 14               | 7                | 0              | -2.056825               | -0.393430 | -0.899904 |
| 15               | 7                | 0              | 3.015225                | 1.890738  | 0.083503  |
| 16               | 7                | 0              | 5.220892                | -1.167713 | 0.005201  |
| 17               | 6                | 0              | -2.706452               | -0.856899 | 0.213841  |
| 18               | 6                | 0              | -0.890154               | 0.310279  | 0.860332  |
| 19               | 6                | 0              | -0.941913               | 0.342549  | -0.509069 |
| 20               | 6                | 0              | -2.434434               | -0.639446 | -2.271187 |
| 21               | 6                | 0              | -2.402571               | -1.949676 | -2.762719 |
| 22               | 6                | 0              | -2.742375               | -2.177509 | -4.100769 |
| 23               | 1                | 0              | -2.736934               | -3.188880 | -4.490757 |
| 24               | 6                | 0              | -3.097340               | -1.103504 | -4.930640 |
| 25               | 1                | 0              | -3.365744               | -1.285765 | -5.965369 |
| 26               | 6                | 0              | -3.122080               | 0.202375  | -4.421591 |
| 27               | 1                | 0              | -3.416137               | 1.030124  | -5.056285 |
| 28               | 6                | 0              | -2.793775               | 0.442502  | -3.082040 |
| 29               | 6                | 0              | -2.266349               | -0.729969 | 2.683738  |
| 30               | 6                | 0              | -1.299408               | -1.421152 | 3.426598  |
| 31               | 6                | 0              | -1.551493               | -1.703282 | 4.774245  |
| 32               | 1                | 0              | -0.811717               | -2.238429 | 5.358930  |
| 33               | 6                | 0              | -2.762176               | -1.305199 | 5.361219  |
| 34               | 1                | 0              | -2.958888               | -1.531937 | 6.403288  |
| 35               | 6                | 0              | -3.720445               | -0.619959 | 4.600640  |
| 36               | 1                | 0              | -4.660648               | -0.318205 | 5.046879  |
| 37               | 6                | 0              | -3.475838               | -0.321313 | 3.254446  |
| 38               | 6                | 0              | 3.470527                | 0.545105  | 0.088938  |
| 39               | 1                | 0              | 2.692182                | -0.203613 | 0.178939  |
| 40               | 6                | 0              | 4.768076                | 0.185244  | -0.005767 |
| 41               | 1                | 0              | 5.549115                | 0.927413  | -0.097045 |
| 42               | 6                | 0              | 4.179855                | -2.174975 | 0.145005  |
| 43               | 6                | 0              | 3.806440                | -2.609591 | 1.423227  |
| 44               | 6                | 0              | 2.800991                | -3.577052 | 1.555994  |
| 45               | 1                | 0              | 2.521856                | -3.931335 | 2.542467  |
| 46               | 6                | 0              | 2.168319                | -4.096968 | 0.416080  |
| 47               | 1                | 0              | 1.396506                | -4.851902 | 0.520646  |
| 48               | 6                | 0              | 2.541949                | -3.646768 | -0.859585 |
| 49               | 1                | 0              | 2.059227                | -4.050644 | -1.742718 |
| 50               | 6                | 0              | 3.548267                | -2.681007 | -0.998242 |
| 51               | 6                | 0              | 3.996240                | 2.950213  | 0.006478  |
| 52               | 6                | 0              | 4.552742                | 3.468773  | 1.185071  |
| 53               | 6                | 0              | 5.504004                | 4.494831  | 1.108854  |
| 54               | 1                | 0              | 5.932431                | 4.901221  | 2.018372  |
| 55               | 6                | 0              | 5.898105                | 4.997478  | -0.140598 |
| 56               | 1                | 0              | 6.632849                | 5.793144  | -0.197303 |
| 57               | 6                | 0              | 5.342952                | 4.470757  | -1.316505 |
| 58               | 1                | 0              | 5.647271                | 4.857699  | -2.282719 |
| 59               | 6                | 0              | 4.391686                | 3.444035  | -1.245505 |
| 60               | 1                | 0              | -4.208617               | 0.216198  | 2.664911  |
| 61               | 1                | 0              | -0.375977               | -1.743571 | 2.957469  |
| 62               | 1                | 0              | -2.843490               | 1.441798  | -2.667049 |
| 63               | 1                | 0              | -2.134868               | -2.771104 | -2.108844 |
| 64               | 1                | 0              | 4.238699                | 3.070079  | 2.143648  |
| 65               | 1                | 0              | 3.957025                | 3.025054  | -2.146823 |
| 66               | 1                | 0              | 4.310492                | -2.204844 | 2.293912  |
| 67               | 1                | 0              | 3.853381                | -2.330220 | -1.977913 |

**Table S6.** Coordinates of the B3LYP/6-311G\*\* geometry of **10-Ph.**

| Center<br>Number | Atomic<br>Number | Atomic<br>Type | Coordinates (Angstroms) |           |           |
|------------------|------------------|----------------|-------------------------|-----------|-----------|
|                  |                  |                | X                       | Y         | Z         |
| 1                | 14               | 0              | 1.889172                | 1.280338  | -0.694905 |
| 2                | 16               | 0              | -1.666300               | -4.296898 | 0.196174  |
| 3                | 16               | 0              | -2.424241               | 1.103888  | -0.594508 |
| 4                | 16               | 0              | 0.756390                | 0.590472  | 1.024859  |
| 5                | 17               | 0              | 0.812556                | 0.795442  | -2.416781 |
| 6                | 17               | 0              | -3.371056               | 0.792140  | 2.398000  |
| 7                | 17               | 0              | -4.252223               | 3.145887  | 0.681654  |
| 8                | 5                | 0              | -3.344151               | 1.646963  | 0.866215  |
| 9                | 7                | 0              | -2.229590               | -1.657861 | -0.284276 |
| 10               | 7                | 0              | -0.276246               | -1.974197 | 0.659095  |
| 11               | 7                | 0              | 2.258638                | 2.959479  | -0.433269 |
| 12               | 7                | 0              | 3.571018                | 0.841829  | -0.812281 |
| 13               | 6                | 0              | -1.389860               | -2.653053 | 0.188484  |
| 14               | 6                | 0              | -1.654752               | -0.398626 | -0.083405 |
| 15               | 6                | 0              | -0.429250               | -0.591444 | 0.478641  |
| 16               | 6                | 0              | 0.782326                | -2.607001 | 1.397064  |
| 17               | 6                | 0              | 0.761640                | -2.553654 | 2.788562  |
| 18               | 6                | 0              | 1.781029                | -3.164814 | 3.512106  |
| 19               | 1                | 0              | 1.769094                | -3.125929 | 4.595096  |
| 20               | 6                | 0              | 2.807045                | -3.830404 | 2.844558  |
| 21               | 1                | 0              | 3.598541                | -4.309657 | 3.409416  |
| 22               | 6                | 0              | 2.814929                | -3.883712 | 1.452532  |
| 23               | 1                | 0              | 3.611732                | -4.398033 | 0.929789  |
| 24               | 6                | 0              | 1.800402                | -3.270995 | 0.722556  |
| 25               | 6                | 0              | -3.505606               | -1.904399 | -0.896366 |
| 26               | 6                | 0              | -3.607041               | -1.914064 | -2.284481 |
| 27               | 6                | 0              | -4.847184               | -2.133709 | -2.877619 |
| 28               | 1                | 0              | -4.931876               | -2.142469 | -3.957941 |
| 29               | 6                | 0              | -5.972443               | -2.347366 | -2.084493 |
| 30               | 1                | 0              | -6.936564               | -2.521152 | -2.548402 |
| 31               | 6                | 0              | -5.859158               | -2.343400 | -0.695468 |
| 32               | 1                | 0              | -6.732124               | -2.516816 | -0.077252 |
| 33               | 6                | 0              | -4.622975               | -2.121904 | -0.095550 |
| 34               | 6                | 0              | 3.664745                | 3.139624  | -0.478722 |
| 35               | 1                | 0              | 4.070241                | 4.137340  | -0.428800 |
| 36               | 6                | 0              | 4.361223                | 2.012443  | -0.676987 |
| 37               | 1                | 0              | 5.428172                | 1.940202  | -0.816018 |
| 38               | 6                | 0              | 4.195493                | -0.430122 | -0.939330 |
| 39               | 6                | 0              | 5.259115                | -0.776528 | -0.097307 |
| 40               | 6                | 0              | 5.906018                | -1.998351 | -0.250506 |
| 41               | 1                | 0              | 6.730490                | -2.250909 | 0.406758  |
| 42               | 6                | 0              | 5.490881                | -2.899351 | -1.229681 |
| 43               | 1                | 0              | 5.997300                | -3.850192 | -1.348366 |
| 44               | 6                | 0              | 4.422756                | -2.563563 | -2.058240 |
| 45               | 1                | 0              | 4.096389                | -3.251066 | -2.830541 |
| 46               | 6                | 0              | 3.781974                | -1.334187 | -1.923857 |
| 47               | 6                | 0              | 1.395461                | 4.023857  | -0.057205 |
| 48               | 6                | 0              | 1.767742                | 4.916122  | 0.955701  |
| 49               | 6                | 0              | 0.922430                | 5.961845  | 1.313047  |
| 50               | 1                | 0              | 1.223802                | 6.644331  | 2.099815  |
| 51               | 6                | 0              | -0.309601               | 6.122645  | 0.682499  |
| 52               | 1                | 0              | -0.969172               | 6.933351  | 0.968519  |
| 53               | 6                | 0              | -0.685078               | 5.230446  | -0.319065 |
| 54               | 1                | 0              | -1.638081               | 5.346985  | -0.822208 |
| 55               | 6                | 0              | 0.163754                | 4.194219  | -0.697968 |
| 56               | 1                | 0              | -0.050452               | -2.045206 | 3.294010  |
| 57               | 1                | 0              | 1.791696                | -3.311581 | -0.358416 |
| 58               | 1                | 0              | 5.565386                | -0.089467 | 0.682596  |
| 59               | 1                | 0              | 2.982918                | -1.062490 | -2.601548 |
| 60               | 1                | 0              | -2.720899               | -1.757810 | -2.887452 |
| 61               | 1                | 0              | -4.516185               | -2.128218 | 0.981715  |
| 62               | 1                | 0              | -0.120411               | 3.528135  | -1.503072 |
| 63               | 1                | 0              | 2.708211                | 4.774673  | 1.474769  |

## SUPPORTING INFORMATION of X-RAY

### Compound **5**·(toluene)<sub>2</sub>

**Table S7.** Sample and crystal data for Compound **5**·(toluene)<sub>2</sub>.

|                               |                                                                                                 |                |
|-------------------------------|-------------------------------------------------------------------------------------------------|----------------|
| <b>Identification code</b>    | <b>5</b> ·(toluene) <sub>2</sub>                                                                |                |
| <b>Chemical formula</b>       | C <sub>67</sub> H <sub>86</sub> B <sub>2</sub> Br <sub>6</sub> N <sub>4</sub> S <sub>3</sub> Si |                |
| <b>Formula weight</b>         | 1572.74 g/mol                                                                                   |                |
| <b>Temperature</b>            | 135(2) K                                                                                        |                |
| <b>Wavelength</b>             | 0.71073 Å                                                                                       |                |
| <b>Crystal size</b>           | 0.140 x 0.230 x 0.300 mm                                                                        |                |
| <b>Crystal system</b>         | triclinic                                                                                       |                |
| <b>Space group</b>            | P-1 (No. 2)                                                                                     |                |
| <b>Unit cell dimensions</b>   | a = 11.0692(8) Å                                                                                | α = 81.044(2)° |
|                               | b = 16.5906(12) Å                                                                               | β = 83.385(2)° |
|                               | c = 21.0529(15) Å                                                                               | γ = 71.370(2)° |
| <b>Volume</b>                 | 3610.1(5) Å <sup>3</sup>                                                                        |                |
| <b>Z</b>                      | 2                                                                                               |                |
| <b>Density (calculated)</b>   | 1.447 g/cm <sup>3</sup>                                                                         |                |
| <b>Absorption coefficient</b> | 3.480 mm <sup>-1</sup>                                                                          |                |
| <b>F(000)</b>                 | 1596                                                                                            |                |



**Table S8.** Data collection and structure refinement for **5·(toluene)<sub>2</sub>**.

|                                          |                                                                                                                               |
|------------------------------------------|-------------------------------------------------------------------------------------------------------------------------------|
| <b>Theta range for data collection</b>   | 1.95 to 34.34°                                                                                                                |
| <b>Index ranges</b>                      | -17<=h<=17, -26<=k<=26, -33<=l<=33                                                                                            |
| <b>Reflections collected</b>             | 178861                                                                                                                        |
| <b>Independent reflections</b>           | 30247 [R(int) = 0.0920]                                                                                                       |
| <b>Max. and min. transmission</b>        | 0.7470 and 0.3820                                                                                                             |
| <b>Structure solution technique</b>      | direct methods                                                                                                                |
| <b>Structure solution program</b>        | SHELXT 2014/5 (Sheldrick, 2014)                                                                                               |
| <b>Refinement method</b>                 | Full-matrix least-squares on F <sup>2</sup>                                                                                   |
| <b>Refinement program</b>                | SHELXL-2018/3 (Sheldrick, 2018)                                                                                               |
| <b>Function minimized</b>                | $\Sigma w(F_o^2 - F_c^2)^2$                                                                                                   |
| <b>Data / restraints / parameters</b>    | 30247 / 514 / 863                                                                                                             |
| <b>Goodness-of-fit on F<sup>2</sup></b>  | 1.025                                                                                                                         |
| <b><math>\Delta/\sigma_{\max}</math></b> | 0.002                                                                                                                         |
| <b>Final R indices</b>                   | 18897data; I>2 $\sigma$ (I)      R1 = 0.0441, wR2 = 0.0909<br>all data                              R1 = 0.0984, wR2 = 0.1072 |
| <b>Weighting scheme</b>                  | $w=1/[\sigma^2(F_o^2)+(0.0421P)^2+0.8911P]$<br>where $P=(F_o^2+2F_c^2)/3$                                                     |
| <b>Largest diff. peak and hole</b>       | 0.998 and -1.256 eÅ <sup>-3</sup>                                                                                             |
| <b>R.M.S. deviation from mean</b>        | 0.112 eÅ <sup>-3</sup>                                                                                                        |

**Table S9.** Bond lengths (Å) for **5·(toluene)<sub>2</sub>**.

|         |            |         |            |
|---------|------------|---------|------------|
| Si1-N3  | 1.6797(18) | Si1-N4  | 1.8197(18) |
| Si1-S2  | 2.1312(7)  | Si1-S3  | 2.1444(8)  |
| S1-C1   | 1.725(2)   | S1-B1   | 1.932(2)   |
| S2-C2   | 1.737(2)   | S3-C3   | 1.739(2)   |
| B1-Br1  | 1.990(2)   | B1-Br2  | 1.996(2)   |
| B1-Br3  | 2.029(2)   | B2-C28  | 1.656(3)   |
| B2-Br4  | 1.983(3)   | B2-Br6  | 2.024(3)   |
| B2-Br5  | 2.045(3)   | N1-C1   | 1.364(2)   |
| N1-C2   | 1.387(3)   | N1-C16  | 1.456(2)   |
| N2-C1   | 1.358(2)   | N2-C3   | 1.375(3)   |
| N2-C4   | 1.462(2)   | N3-C42  | 1.452(3)   |
| N3-C28  | 1.479(3)   | N4-C29  | 1.293(3)   |
| N4-C30  | 1.459(3)   | C2-C3   | 1.353(3)   |
| C4-C5   | 1.399(3)   | C4-C9   | 1.392(3)   |
| C5-C6   | 1.395(3)   | C5-C13  | 1.513(3)   |
| C6-C7   | 1.380(3)   | C7-C8   | 1.376(3)   |
| C8-C9   | 1.407(3)   | C9-C10  | 1.515(3)   |
| C10-C12 | 1.525(3)   | C10-C11 | 1.525(3)   |
| C13-C14 | 1.531(3)   | C13-C15 | 1.536(3)   |
| C16-C21 | 1.408(3)   | C16-C17 | 1.395(3)   |
| C17-C18 | 1.394(3)   | C17-C25 | 1.521(3)   |
| C18-C19 | 1.377(3)   | C19-C20 | 1.381(3)   |
| C20-C21 | 1.391(3)   | C21-C22 | 1.520(3)   |
| C22-C24 | 1.528(3)   | C22-C23 | 1.525(3)   |
| C25-C26 | 1.535(3)   | C25-C27 | 1.540(3)   |
| C28-H28 | 0.95(3)    | C28-C29 | 1.462(3)   |
| C29-H29 | 0.94(3)    | C30-C31 | 1.405(3)   |
| C30-C35 | 1.399(3)   | C31-C32 | 1.394(3)   |
| C31-C39 | 1.518(3)   | C32-C33 | 1.376(4)   |
| C33-C34 | 1.382(4)   | C34-C35 | 1.390(3)   |
| C35-C36 | 1.525(3)   | C36-C38 | 1.525(3)   |
| C36-C37 | 1.528(4)   | C39-C40 | 1.516(4)   |
| C39-C41 | 1.530(4)   | C42-C47 | 1.397(3)   |
| C42-C43 | 1.409(3)   | C43-C44 | 1.393(3)   |
| C43-C51 | 1.518(3)   | C44-C45 | 1.373(4)   |
| C45-C46 | 1.377(4)   | C46-C47 | 1.397(3)   |
| C47-C48 | 1.519(3)   | C48-C49 | 1.525(4)   |
| C48-C50 | 1.536(4)   | C51-C53 | 1.536(3)   |
| C51-C52 | 1.529(3)   | C54-C60 | 1.501(10)  |
| C54-C55 | 1.39       | C54-C59 | 1.39       |

|           |           |           |           |
|-----------|-----------|-----------|-----------|
| C55-C56   | 1.39      | C56-C57   | 1.39      |
| C57-C58   | 1.39      | C58-C59   | 1.39      |
| C54'-C59' | 1.381(13) | C54'-C60' | 1.541(12) |
| C54'-C55' | 1.414(13) | C55'-C56' | 1.410(14) |
| C56'-C57' | 1.373(15) | C57'-C58' | 1.344(14) |
| C58'-C59' | 1.372(14) | C61-C62   | 1.39      |
| C61-C66   | 1.39      | C61-C67   | 1.595(10) |
| C62-C63   | 1.39      | C63-C64   | 1.39      |
| C64-C65   | 1.39      | C65-C66   | 1.39      |
| C61'-C62' | 1.418(14) | C61'-C67' | 1.562(12) |
| C61'-C66' | 1.415(14) | C62'-C63' | 1.371(14) |
| C63'-C64' | 1.380(14) | C64'-C65' | 1.343(15) |
| C65'-C66' | 1.395(16) |           |           |

**Table S10.** Bond angles (°) for **5•(toluene)<sub>2</sub>**.

|             |            |             |            |
|-------------|------------|-------------|------------|
| N3-Si1-N4   | 91.15(8)   | N3-Si1-S2   | 113.49(6)  |
| N4-Si1-S2   | 116.63(6)  | N3-Si1-S3   | 125.15(7)  |
| N4-Si1-S3   | 107.84(6)  | S2-Si1-S3   | 102.98(3)  |
| C1-S1-Br1   | 107.44(10) | C2-S2-Si1   | 93.66(7)   |
| C3-S3-Si1   | 93.26(7)   | S1-Br1-Br1  | 111.59(11) |
| S1-Br1-Br2  | 112.55(12) | Br1-Br1-Br2 | 111.33(11) |
| S1-Br1-Br3  | 100.91(11) | Br1-Br1-Br3 | 111.54(11) |
| Br2-Br1-Br3 | 108.45(11) | C28-B2-Br4  | 109.81(16) |
| C28-B2-Br6  | 110.17(15) | Br4-B2-Br6  | 111.45(13) |
| C28-B2-Br5  | 108.60(15) | Br4-B2-Br5  | 109.16(12) |
| Br6-B2-Br5  | 107.59(12) | C1-N1-C2    | 108.02(15) |
| C1-N1-C16   | 129.32(17) | C2-N1-C16   | 122.03(16) |
| C1-N2-C3    | 109.22(16) | C1-N2-C4    | 126.36(17) |
| C3-N2-C4    | 122.08(16) | C42-N3-C28  | 121.86(17) |
| C42-N3-Si1  | 124.88(14) | C28-N3-Si1  | 111.75(13) |
| C29-N4-C30  | 124.46(18) | C29-N4-Si1  | 110.06(14) |
| C30-N4-Si1  | 125.49(14) | N2-C1-N1    | 107.36(17) |
| N2-C1-S1    | 121.35(15) | N1-C1-S1    | 130.61(14) |
| C3-C2-N1    | 108.05(17) | C3-C2-S2    | 124.80(16) |
| N1-C2-S2    | 127.09(14) | N2-C3-C2    | 107.34(17) |
| N2-C3-S3    | 127.55(14) | C2-C3-S3    | 125.11(16) |
| C5-C4-C9    | 124.04(18) | C5-C4-N2    | 119.43(17) |
| C9-C4-N2    | 116.43(17) | C6-C5-C4    | 116.25(19) |
| C6-C5-C13   | 119.58(19) | C4-C5-C13   | 124.17(18) |
| C7-C6-C5    | 121.5(2)   | C8-C7-C6    | 120.64(19) |
| C7-C8-C9    | 120.7(2)   | C4-C9-C8    | 116.83(19) |
| C4-C9-C10   | 123.86(18) | C8-C9-C10   | 119.27(19) |
| C9-C10-C12  | 112.39(19) | C9-C10-C11  | 110.63(19) |
| C12-C10-C11 | 110.86(19) | C5-C13-C14  | 110.60(19) |
| C5-C13-C15  | 110.86(18) | C14-C13-C15 | 110.25(19) |
| C21-C16-C17 | 123.72(18) | C21-C16-N1  | 116.74(17) |
| C17-C16-N1  | 119.26(18) | C16-C17-C18 | 116.5(2)   |
| C16-C17-C25 | 125.56(18) | C18-C17-C25 | 117.96(19) |
| C19-C18-C17 | 121.7(2)   | C18-C19-C20 | 120.2(2)   |
| C19-C20-C21 | 121.3(2)   | C16-C21-C20 | 116.51(19) |
| C16-C21-C22 | 124.02(18) | C20-C21-C22 | 119.43(19) |
| C21-C22-C24 | 110.01(19) | C21-C22-C23 | 112.87(19) |
| C24-C22-C23 | 111.5(2)   | C17-C25-C26 | 112.7(2)   |
| C17-C25-C27 | 110.21(18) | C26-C25-C27 | 108.55(18) |
| H28-C28-N3  | 110.5(16)  | H28-C28-C29 | 107.7(16)  |
| N3-C28-C29  | 106.47(17) | H28-C28-B2  | 106.7(16)  |
| N3-C28-B2   | 115.42(17) | C29-C28-B2  | 109.90(18) |
| H29-C29-N4  | 117.6(15)  | H29-C29-C28 | 125.2(15)  |
| N4-C29-C28  | 117.20(19) | C31-C30-C35 | 123.6(2)   |
| C31-C30-N4  | 119.38(19) | C35-C30-N4  | 116.95(18) |
| C30-C31-C32 | 116.4(2)   | C30-C31-C39 | 123.0(2)   |
| C32-C31-C39 | 120.5(2)   | C33-C32-C31 | 121.4(2)   |

|                |            |                |            |
|----------------|------------|----------------|------------|
| C34-C33-C32    | 120.5(2)   | C33-C34-C35    | 121.2(2)   |
| C34-C35-C30    | 116.6(2)   | C34-C35-C36    | 121.3(2)   |
| C30-C35-C36    | 121.6(2)   | C35-C36-C38    | 114.8(2)   |
| C35-C36-C37    | 108.5(2)   | C38-C36-C37    | 110.5(2)   |
| C40-C39-C31    | 113.7(2)   | C40-C39-C41    | 110.0(2)   |
| C31-C39-C41    | 109.6(2)   | C47-C42-C43    | 121.33(19) |
| C47-C42-N3     | 119.90(19) | C43-C42-N3     | 118.62(18) |
| C44-C43-C42    | 118.3(2)   | C44-C43-C51    | 117.7(2)   |
| C42-C43-C51    | 123.96(19) | C45-C44-C43    | 120.9(2)   |
| C46-C45-C44    | 120.1(2)   | C45-C46-C47    | 121.6(2)   |
| C42-C47-C46    | 117.7(2)   | C42-C47-C48    | 123.52(19) |
| C46-C47-C48    | 118.5(2)   | C47-C48-C49    | 109.0(2)   |
| C47-C48-C50    | 113.0(2)   | C49-C48-C50    | 110.2(2)   |
| C43-C51-C53    | 111.5(2)   | C43-C51-C52    | 111.0(2)   |
| C53-C51-C52    | 111.0(2)   | C60-C54-C55    | 119.3(9)   |
| C60-C54-C59    | 120.7(9)   | C55-C54-C59    | 120.0      |
| C56-C55-C54    | 120.0      | C55-C56-C57    | 120.0      |
| C58-C57-C56    | 120.0      | C57-C58-C59    | 120.0      |
| C58-C59-C54    | 120.0      | C59'-C54'-C60' | 114.5(12)  |
| C59'-C54'-C55' | 119.5(12)  | C60'-C54'-C55' | 126.0(13)  |
| C56'-C55'-C54' | 114.4(13)  | C57'-C56'-C55' | 123.4(14)  |
| C56'-C57'-C58' | 121.0(15)  | C59'-C58'-C57' | 117.1(15)  |
| C58'-C59'-C54' | 123.8(13)  | C62-C61-C66    | 120.0      |
| C62-C61-C67    | 99.9(7)    | C66-C61-C67    | 123.7(7)   |
| C63-C62-C61    | 120.0      | C62-C63-C64    | 120.0      |
| C65-C64-C63    | 120.0      | C64-C65-C66    | 120.0      |
| C65-C66-C61    | 120.0      | C62'-C61'-C67' | 105.7(13)  |
| C62'-C61'-C66' | 115.5(12)  | C67'-C61'-C66' | 96.9(14)   |
| C63'-C62'-C61' | 120.5(13)  | C64'-C63'-C62' | 121.5(13)  |
| C65'-C64'-C63' | 114.2(14)  | C66'-C65'-C64' | 121.1(16)  |
| C65'-C66'-C61' | 113.9(15)  |                |            |

## Compound 6

**Table S11.** Sample and crystal data for Compound 6.

|                               |                                                                                                                                           |
|-------------------------------|-------------------------------------------------------------------------------------------------------------------------------------------|
| <b>Identification code</b>    | <b>6</b>                                                                                                                                  |
| <b>Chemical formula</b>       | $C_{26}H_{36}B_2Br_4N_2$                                                                                                                  |
| <b>Formula weight</b>         | 717.83 g/mol                                                                                                                              |
| <b>Temperature</b>            | 135(2) K                                                                                                                                  |
| <b>Wavelength</b>             | 0.71073 Å                                                                                                                                 |
| <b>Crystal size</b>           | 0.160 x 0.240 x 0.300 mm                                                                                                                  |
| <b>Crystal system</b>         | triclinic                                                                                                                                 |
| <b>Space group</b>            | P-1 (No. 2)                                                                                                                               |
| <b>Unit cell dimensions</b>   | a = 10.8955(14) Å $\alpha = 73.361(5)^\circ$<br>b = 12.618(2) Å $\beta = 89.927(4)^\circ$<br>c = 12.7576(15) Å $\gamma = 64.433(4)^\circ$ |
| <b>Volume</b>                 | 1500.7(4) Å <sup>3</sup>                                                                                                                  |
| <b>Z</b>                      | 2                                                                                                                                         |
| <b>Density (calculated)</b>   | 1.589 g/cm <sup>3</sup>                                                                                                                   |
| <b>Absorption coefficient</b> | 5.381 mm <sup>-1</sup>                                                                                                                    |
| <b>F(000)</b>                 | 712                                                                                                                                       |

**Table S12.** Data collection and structure refinement for **6**.

|                                            |                                                                                                                                                               |
|--------------------------------------------|---------------------------------------------------------------------------------------------------------------------------------------------------------------|
| <b>Theta range for data collection</b>     | 1.89 to 27.10°                                                                                                                                                |
| <b>Index ranges</b>                        | -13<=h<=13, -16<=k<=16, -16<=l<=16                                                                                                                            |
| <b>Reflections collected</b>               | 45339                                                                                                                                                         |
| <b>Independent reflections</b>             | 6613 [R(int) = 0.0741]                                                                                                                                        |
| <b>Coverage of independent reflections</b> | 99.9%                                                                                                                                                         |
| <b>Absorption correction</b>               | Multi-Scan                                                                                                                                                    |
| <b>Max. and min. transmission</b>          | 0.7456 and 0.3306                                                                                                                                             |
| <b>Structure solution technique</b>        | direct methods                                                                                                                                                |
| <b>Structure solution program</b>          | SHELXT 2014/5 (Sheldrick, 2014)                                                                                                                               |
| <b>Refinement method</b>                   | Full-matrix least-squares on F <sup>2</sup>                                                                                                                   |
| <b>Refinement program</b>                  | SHELXL-2018/3 (Sheldrick, 2018)                                                                                                                               |
| <b>Function minimized</b>                  | $\Sigma w(F_o^2 - F_c^2)^2$                                                                                                                                   |
| <b>Data / restraints / parameters</b>      | 6613 / 12 / 308                                                                                                                                               |
| <b>Goodness-of-fit on F<sup>2</sup></b>    | 1.015                                                                                                                                                         |
| <b>Final R indices</b>                     | 5372 data; I>2σ(I) R1 = 0.0441, wR2 = 0.1105<br>all data R1 = 0.0627, wR2 = 0.1206                                                                            |
| <b>Weighting scheme</b>                    | w=1/[σ <sup>2</sup> (F <sub>o</sub> <sup>2</sup> )+(0.0647P) <sup>2</sup> +2.2327P]<br>where P=(F <sub>o</sub> <sup>2</sup> +2F <sub>c</sub> <sup>2</sup> )/3 |
| <b>Largest diff. peak and hole</b>         | 0.714 and -1.173 eÅ <sup>-3</sup>                                                                                                                             |
| <b>R.M.S. deviation from mean</b>          | 0.125 eÅ <sup>-3</sup>                                                                                                                                        |

**Table S13.** Bond lengths (Å) for **6**.

|         |          |           |          |
|---------|----------|-----------|----------|
| Br1-B1  | 1.905(5) | Br2-B1    | 1.919(5) |
| Br3-B2  | 1.919(5) | Br4-B2    | 1.918(5) |
| B1-N1   | 1.387(6) | B2-N2     | 1.378(6) |
| N1-C1   | 1.430(5) | N1-C2     | 1.449(5) |
| N2-C14  | 1.425(5) | N2-C15    | 1.466(5) |
| C1-C1#1 | 1.310(9) | C2-C3     | 1.404(8) |
| C2-C7   | 1.381(7) | C3-C4     | 1.395(8) |
| C3-C11  | 1.509(8) | C4-C5     | 1.383(8) |
| C5-C6   | 1.370(8) | C6-C7     | 1.412(7) |
| C7-C8   | 1.526(8) | C8-C10    | 1.509(8) |
| C8-C9   | 1.522(8) | C11-C13   | 1.529(8) |
| C11-C12 | 1.537(9) | C14-C14#2 | 1.319(9) |
| C15-C16 | 1.374(8) | C15-C20   | 1.394(7) |
| C16-C17 | 1.396(7) | C16-C24   | 1.516(8) |
| C17-C18 | 1.354(9) | C18-C19   | 1.405(9) |
| C19-C20 | 1.396(7) | C20-C21   | 1.535(8) |
| C21-C22 | 1.520(8) | C21-C23   | 1.537(9) |
| C24-C26 | 1.506(9) | C24-C25   | 1.524(9) |

Symmetry transformations used to generate equivalent atoms:

#1 -x+1, -y+1, -z+2

#2 -x+2, -y+1, -z+1



**Table S14.** Bond angles (°) for **6**.

|             |          |              |          |
|-------------|----------|--------------|----------|
| N1-B1-Br1   | 121.5(4) | N1-B1-Br2    | 121.5(3) |
| Br1-B1-Br2  | 117.0(3) | N2-B2-Br4    | 121.8(4) |
| N2-B2-Br3   | 121.3(4) | Br4-B2-Br3   | 116.8(3) |
| C1-N1-B1    | 123.8(4) | C1-N1-C2     | 114.9(3) |
| B1-N1-C2    | 121.3(4) | B2-N2-C14    | 124.1(4) |
| B2-N2-C15   | 120.7(4) | C14-N2-C15   | 115.2(3) |
| N1-C1-C1#1  | 123.5(5) | C3-C2-C7     | 122.9(4) |
| C3-C2-N1    | 118.9(4) | C7-C2-N1     | 118.1(5) |
| C2-C3-C4    | 117.9(5) | C2-C3-C11    | 123.2(4) |
| C4-C3-C11   | 118.9(5) | C5-C4-C3     | 120.5(5) |
| C4-C5-C6    | 120.2(4) | C7-C6-C5     | 121.7(5) |
| C6-C7-C2    | 116.8(5) | C6-C7-C8     | 120.3(5) |
| C2-C7-C8    | 122.9(4) | C10-C8-C9    | 110.8(5) |
| C10-C8-C7   | 112.1(5) | C9-C8-C7     | 111.2(4) |
| C13-C11-C3  | 110.8(5) | C13-C11-C12  | 112.1(6) |
| C3-C11-C12  | 111.7(5) | N2-C14-C14#2 | 123.2(5) |
| C16-C15-C20 | 123.3(4) | C16-C15-N2   | 119.4(4) |
| C20-C15-N2  | 117.2(4) | C15-C16-C17  | 117.6(5) |
| C15-C16-C24 | 123.6(4) | C17-C16-C24  | 118.8(5) |
| C18-C17-C16 | 122.0(5) | C17-C18-C19  | 119.1(4) |
| C20-C19-C18 | 121.2(5) | C19-C20-C15  | 116.7(5) |
| C19-C20-C21 | 120.1(5) | C15-C20-C21  | 123.1(4) |
| C22-C21-C23 | 111.9(5) | C22-C21-C20  | 111.0(5) |
| C23-C21-C20 | 110.1(5) | C26-C24-C16  | 110.9(5) |
| C26-C24-C25 | 110.7(6) | C16-C24-C25  | 112.3(5) |

Symmetry transformations used to generate equivalent atoms:

#1 -x+1, -y+1, -z+2

#2 -x+2, -y+1, -z+1

Compound 7

**Table S15.** Sample and crystal data for compound 7.

|                               |                                                                                                   |
|-------------------------------|---------------------------------------------------------------------------------------------------|
| <b>Identification code</b>    | 7                                                                                                 |
| <b>Chemical formula</b>       | C <sub>27</sub> H <sub>34</sub> B <sub>2</sub> Br <sub>4</sub> N <sub>2</sub> S <sub>3</sub>      |
| <b>Formula weight</b>         | 824.00 g/mol                                                                                      |
| <b>Temperature</b>            | 135(2) K                                                                                          |
| <b>Wavelength</b>             | 0.71073 Å                                                                                         |
| <b>Crystal size</b>           | 0.140 x 0.230 x 0.290 mm                                                                          |
| <b>Crystal system</b>         | monoclinic                                                                                        |
| <b>Space group</b>            | P2 <sub>1</sub> /c (No. 14)                                                                       |
| <b>Unit cell dimensions</b>   | a = 18.3185(13) Å    α = 90°<br>b = 9.6977(7) Å    β = 94.033(3)°<br>c = 18.5961(13) Å    γ = 90° |
| <b>Volume</b>                 | 3295.4(4) Å <sup>3</sup>                                                                          |
| <b>Z</b>                      | 4                                                                                                 |
| <b>Density (calculated)</b>   | 1.661 g/cm <sup>3</sup>                                                                           |
| <b>Absorption coefficient</b> | 5.096 mm <sup>-1</sup>                                                                            |
| <b>F(000)</b>                 | 1632                                                                                              |

**Table S16.** Data collection and structure refinement for 7.

|                                          |                                                                                             |
|------------------------------------------|---------------------------------------------------------------------------------------------|
| <b>Theta range for data collection</b>   | 2.65 to 27.88°                                                                              |
| <b>Index ranges</b>                      | -24<=h<=24, -12<=k<=12, -24<=l<=24                                                          |
| <b>Reflections collected</b>             | 109263                                                                                      |
| <b>Independent reflections</b>           | 7863 [R(int) = 0.1375]                                                                      |
| <b>Max. and min. transmission</b>        | 0.7457 and 0.4806                                                                           |
| <b>Structure solution technique</b>      | direct methods                                                                              |
| <b>Structure solution program</b>        | SHELXT 2014/5 (Sheldrick, 2014)                                                             |
| <b>Refinement method</b>                 | Full-matrix least-squares on F <sup>2</sup>                                                 |
| <b>Refinement program</b>                | SHELXL-2018/3 (Sheldrick, 2018)                                                             |
| <b>Function minimized</b>                | $\Sigma w(F_o^2 - F_c^2)^2$                                                                 |
| <b>Data / restraints / parameters</b>    | 7863 / 0 / 343                                                                              |
| <b>Goodness-of-fit on F<sup>2</sup></b>  | 1.000                                                                                       |
| <b><math>\Delta/\sigma_{\max}</math></b> | 0.001                                                                                       |
| <b>Final R indices</b>                   | 5784 data; I>2 $\sigma$ (I) R1 = 0.0408, wR2 = 0.0783<br>all data R1 = 0.0702, wR2 = 0.0877 |
| <b>Weighting scheme</b>                  | $w=1/[\sigma^2(F_o^2)+(0.0369P)^2+4.5247P]$<br>where $P=(F_o^2+2F_c^2)/3$                   |
| <b>Largest diff. peak and hole</b>       | 0.596 and -0.555 eÅ <sup>-3</sup>                                                           |
| <b>R.M.S. deviation from mean</b>        | 0.112 eÅ <sup>-3</sup>                                                                      |

**Table S17.** Bond lengths (Å) for **7**.

|         |          |         |          |
|---------|----------|---------|----------|
| B1-S3   | 1.808(4) | B1-S2   | 1.810(4) |
| B1-Br1  | 1.884(4) | B2-S1   | 1.935(4) |
| B2-Br2  | 1.991(4) | B2-Br3  | 1.997(4) |
| B2-Br4  | 2.027(4) | S1-C1   | 1.723(3) |
| S2-C2   | 1.741(3) | S3-C3   | 1.733(4) |
| N1-C1   | 1.366(4) | N1-C2   | 1.373(4) |
| N1-C16  | 1.458(4) | N2-C3   | 1.371(4) |
| N2-C1   | 1.362(4) | N2-C4   | 1.456(4) |
| C2-C3   | 1.347(5) | C4-C5   | 1.387(5) |
| C4-C9   | 1.405(5) | C5-C6   | 1.394(5) |
| C5-C13  | 1.515(5) | C6-C7   | 1.368(5) |
| C7-C8   | 1.382(5) | C8-C9   | 1.383(5) |
| C9-C10  | 1.516(5) | C10-C12 | 1.526(6) |
| C10-C11 | 1.535(5) | C13-C15 | 1.527(6) |
| C13-C14 | 1.535(5) | C16-C17 | 1.395(5) |
| C16-C21 | 1.398(5) | C17-C18 | 1.384(5) |
| C17-C25 | 1.512(5) | C18-C19 | 1.380(6) |
| C19-C20 | 1.375(6) | C20-C21 | 1.400(5) |
| C21-C22 | 1.512(6) | C22-C24 | 1.523(6) |
| C22-C23 | 1.532(6) | C25-C27 | 1.530(6) |
| C25-C26 | 1.518(6) |         |          |

**Table S18.** Bond angles (°) for **7**.

|             |            |             |            |
|-------------|------------|-------------|------------|
| S3-B1-S2    | 116.0(2)   | S3-B1-Br1   | 121.1(2)   |
| S2-B1-Br1   | 122.8(2)   | S1-B2-Br2   | 112.9(2)   |
| S1-B2-Br3   | 111.9(2)   | Br2-B2-Br3  | 112.2(2)   |
| S1-B2-Br4   | 99.97(19)  | Br2-B2-Br4  | 108.7(2)   |
| Br3-B2-Br4  | 110.47(19) | C1-S1-B2    | 112.58(17) |
| C2-S2-B1    | 92.22(18)  | C3-S3-B1    | 92.30(18)  |
| C1-N1-C2    | 108.4(3)   | C1-N1-C16   | 127.9(3)   |
| C2-N1-C16   | 123.2(3)   | C3-N2-C1    | 109.0(3)   |
| C3-N2-C4    | 124.5(3)   | C1-N2-C4    | 126.0(3)   |
| N1-C1-N2    | 106.8(3)   | N1-C1-S1    | 131.8(3)   |
| N2-C1-S1    | 120.1(2)   | C3-C2-N1    | 108.2(3)   |
| C3-C2-S2    | 119.4(3)   | N1-C2-S2    | 131.5(3)   |
| C2-C3-N2    | 107.6(3)   | C2-C3-S3    | 120.0(3)   |
| N2-C3-S3    | 132.0(3)   | C5-C4-C9    | 124.4(3)   |
| C5-C4-N2    | 117.7(3)   | C9-C4-N2    | 117.9(3)   |
| C4-C5-C6    | 116.3(3)   | C4-C5-C13   | 123.6(3)   |
| C6-C5-C13   | 120.1(3)   | C7-C6-C5    | 121.3(4)   |
| C6-C7-C8    | 120.5(3)   | C7-C8-C9    | 121.6(4)   |
| C4-C9-C8    | 115.8(3)   | C4-C9-C10   | 122.6(3)   |
| C8-C9-C10   | 121.5(3)   | C9-C10-C12  | 110.7(3)   |
| C9-C10-C11  | 112.3(3)   | C12-C10-C11 | 110.7(4)   |
| C5-C13-C15  | 112.4(3)   | C5-C13-C14  | 110.2(3)   |
| C15-C13-C14 | 111.0(3)   | C17-C16-C21 | 124.5(3)   |
| C17-C16-N1  | 116.9(3)   | C21-C16-N1  | 118.5(3)   |
| C16-C17-C18 | 116.6(3)   | C16-C17-C25 | 124.0(3)   |
| C18-C17-C25 | 119.4(3)   | C19-C18-C17 | 121.3(4)   |
| C20-C19-C18 | 120.5(4)   | C19-C20-C21 | 121.5(4)   |
| C16-C21-C20 | 115.7(4)   | C16-C21-C22 | 123.9(3)   |
| C20-C21-C22 | 120.5(3)   | C24-C22-C21 | 111.3(4)   |
| C24-C22-C23 | 109.2(4)   | C21-C22-C23 | 112.0(4)   |
| C17-C25-C27 | 110.5(3)   | C17-C25-C26 | 112.6(3)   |
| C27-C25-C26 | 110.2(3)   |             |            |

## Compound 8

**Table S19.** Sample and crystal data for compound 8.

|                               |                                                                                                                                  |
|-------------------------------|----------------------------------------------------------------------------------------------------------------------------------|
| <b>Identification code</b>    | <b>8</b>                                                                                                                         |
| <b>Chemical formula</b>       | $C_{53}H_{70}B_2I_6N_4S_3Si$                                                                                                     |
| <b>Formula weight</b>         | 1670.42 g/mol                                                                                                                    |
| <b>Temperature</b>            | 135(2) K                                                                                                                         |
| <b>Wavelength</b>             | 0.71073 Å                                                                                                                        |
| <b>Crystal size</b>           | 0.140 x 0.230 x 0.300 mm                                                                                                         |
| <b>Crystal system</b>         | monoclinic                                                                                                                       |
| <b>Space group</b>            | $P2_1/n$ (No. 14)                                                                                                                |
| <b>Unit cell dimensions</b>   | $a = 11.2064(9)$ Å $\alpha = 90^\circ$<br>$b = 27.535(2)$ Å $\beta = 91.136(2)^\circ$<br>$c = 20.4784(15)$ Å $\gamma = 90^\circ$ |
| <b>Volume</b>                 | $6317.8(8)$ Å <sup>3</sup>                                                                                                       |
| <b>Z</b>                      | 4                                                                                                                                |
| <b>Density (calculated)</b>   | 1.756 g/cm <sup>3</sup>                                                                                                          |
| <b>Absorption coefficient</b> | 3.104 mm <sup>-1</sup>                                                                                                           |
| <b>F(000)</b>                 | 3224                                                                                                                             |

**Table S20.** Data collection and structure refinement for **8**.

|                                          |                                                                                                                           |
|------------------------------------------|---------------------------------------------------------------------------------------------------------------------------|
| <b>Theta range for data collection</b>   | 2.09 to 27.48°                                                                                                            |
| <b>Index ranges</b>                      | -14<=h<=14, -35<=k<=35, -26<=l<=26                                                                                        |
| <b>Reflections collected</b>             | 187491                                                                                                                    |
| <b>Independent reflections</b>           | 14489 [R(int) = 0.0966]                                                                                                   |
| <b>Max. and min. transmission</b>        | 0.7456 and 0.5248                                                                                                         |
| <b>Structure solution technique</b>      | direct methods                                                                                                            |
| <b>Structure solution program</b>        | SHELXT 2014/5 (Sheldrick, 2014)                                                                                           |
| <b>Refinement method</b>                 | Full-matrix least-squares on F <sup>2</sup>                                                                               |
| <b>Refinement program</b>                | SHELXL-2018/3 (Sheldrick, 2018)                                                                                           |
| <b>Function minimized</b>                | $\Sigma w(F_o^2 - F_c^2)^2$                                                                                               |
| <b>Data / restraints / parameters</b>    | 14489 / 2 / 629                                                                                                           |
| <b>Goodness-of-fit on F<sup>2</sup></b>  | 1.040                                                                                                                     |
| <b><math>\Delta/\sigma_{\max}</math></b> | 0.003                                                                                                                     |
| <b>Final R indices</b>                   | 10190 data; I>2 $\sigma$ (I) R1 = 0.0718, wR2 = 0.1711<br>all data R1 = 0.1088, wR2 = 0.2014                              |
| <b>Weighting scheme</b>                  | w=1/[ $\sigma^2(F_o^2)+(0.0742P)^2+159.7453P$ ]<br>where P=(F <sub>o</sub> <sup>2</sup> +2F <sub>c</sub> <sup>2</sup> )/3 |
| <b>Largest diff. peak and hole</b>       | 2.384 and -1.390 eÅ <sup>-3</sup>                                                                                         |
| <b>R.M.S. deviation from mean</b>        | 0.262 eÅ <sup>-3</sup>                                                                                                    |

**Table S21.** Bond lengths (Å) for **8**.

|         |           |         |           |
|---------|-----------|---------|-----------|
| Si1-N3  | 1.682(8)  | Si1-N4  | 1.803(8)  |
| Si1-S2  | 2.143(3)  | Si1-S3  | 2.138(3)  |
| S1-C1   | 1.741(10) | S1-B1   | 1.921(12) |
| S2-C2   | 1.745(9)  | S3-C3   | 1.740(10) |
| B1-I1   | 2.210(11) | B1-I3   | 2.231(11) |
| B1-I2   | 2.250(11) | B2-C28  | 1.654(14) |
| B2-I4   | 2.237(12) | B2-I6   | 2.248(11) |
| B2-I5   | 2.247(13) | N1-C1   | 1.366(12) |
| N1-C2   | 1.392(11) | N1-C16  | 1.472(12) |
| N2-C3   | 1.343(12) | N2-C1   | 1.343(12) |
| N2-C4   | 1.444(12) | N3-C42  | 1.455(13) |
| N3-C28  | 1.472(12) | N4-C29  | 1.320(12) |
| N4-C30  | 1.455(12) | C2-C3   | 1.360(13) |
| C4-C5   | 1.378(14) | C4-C9   | 1.411(13) |
| C5-C6   | 1.423(14) | C5-C13  | 1.489(14) |
| C6-C7   | 1.371(15) | C7-C8   | 1.361(17) |
| C8-C9   | 1.402(15) | C9-C10  | 1.545(14) |
| C10-C11 | 1.519(16) | C10-C12 | 1.535(16) |
| C13-C14 | 1.542(15) | C13-C15 | 1.544(16) |
| C16-C21 | 1.394(14) | C16-C17 | 1.411(14) |
| C17-C18 | 1.428(14) | C17-C25 | 1.518(13) |
| C18-C19 | 1.381(16) | C19-C20 | 1.386(18) |
| C20-C21 | 1.382(15) | C21-C22 | 1.509(16) |
| C22-C23 | 1.525(16) | C22-C24 | 1.513(18) |
| C25-C26 | 1.510(16) | C25-C27 | 1.536(15) |
| C28-H28 | 1.00(2)   | C28-C29 | 1.449(13) |
| C29-H29 | 0.96(2)   | C30-C31 | 1.368(15) |
| C30-C35 | 1.415(14) | C31-C32 | 1.409(15) |
| C31-C39 | 1.518(16) | C32-C33 | 1.39(2)   |
| C33-C34 | 1.36(2)   | C34-C35 | 1.404(16) |
| C35-C36 | 1.487(17) | C36-C38 | 1.550(15) |
| C36-C37 | 1.526(15) | C39-C41 | 1.528(18) |
| C39-C40 | 1.509(17) | C42-C47 | 1.418(14) |
| C42-C43 | 1.406(14) | C43-C44 | 1.388(15) |
| C43-C51 | 1.523(14) | C44-C45 | 1.375(17) |
| C45-C46 | 1.367(17) | C46-C47 | 1.394(16) |
| C47-C48 | 1.514(15) | C48-C50 | 1.519(14) |
| C48-C49 | 1.532(15) | C51-C53 | 1.547(15) |
| C51-C52 | 1.541(16) |         |           |



**Table S22.** Bond angles (°) for **8**.

|             |           |             |            |
|-------------|-----------|-------------|------------|
| N3-Si1-N4   | 91.3(4)   | N3-Si1-S2   | 112.8(3)   |
| N4-Si1-S2   | 121.1(3)  | N3-Si1-S3   | 126.2(3)   |
| N4-Si1-S3   | 103.9(3)  | S2-Si1-S3   | 102.70(14) |
| C1-S1-B1    | 109.4(5)  | C2-S2-Si1   | 93.7(3)    |
| C3-S3-Si1   | 93.8(3)   | S1-B1-I1    | 113.2(5)   |
| S1-B1-I3    | 101.3(5)  | I1-B1-I3    | 111.1(5)   |
| S1-B1-I2    | 110.1(5)  | I1-B1-I2    | 111.9(5)   |
| I3-B1-I2    | 108.7(5)  | C28-B2-I4   | 109.5(6)   |
| C28-B2-I6   | 108.0(7)  | I4-B2-I6    | 108.7(5)   |
| C28-B2-I5   | 110.9(7)  | I4-B2-I5    | 108.3(5)   |
| I6-B2-I5    | 111.4(5)  | C1-N1-C2    | 107.3(7)   |
| C1-N1-C16   | 129.1(8)  | C2-N1-C16   | 123.3(8)   |
| C3-N2-C1    | 110.0(8)  | C3-N2-C4    | 121.0(8)   |
| C1-N2-C4    | 127.5(8)  | C42-N3-C28  | 120.7(7)   |
| C42-N3-Si1  | 124.5(6)  | C28-N3-Si1  | 112.7(6)   |
| C29-N4-C30  | 122.6(8)  | C29-N4-Si1  | 109.6(7)   |
| C30-N4-Si1  | 127.8(6)  | N1-C1-N2    | 107.6(8)   |
| N1-C1-S1    | 130.1(8)  | N2-C1-S1    | 121.2(7)   |
| C3-C2-N1    | 107.1(8)  | C3-C2-S2    | 124.2(7)   |
| N1-C2-S2    | 128.6(7)  | N2-C3-C2    | 108.0(8)   |
| N2-C3-S3    | 127.0(7)  | C2-C3-S3    | 125.0(7)   |
| C5-C4-C9    | 124.2(9)  | C5-C4-N2    | 120.0(9)   |
| C9-C4-N2    | 115.7(8)  | C4-C5-C6    | 115.5(9)   |
| C4-C5-C13   | 124.7(9)  | C6-C5-C13   | 119.7(9)   |
| C7-C6-C5    | 121.4(10) | C8-C7-C6    | 121.4(10)  |
| C7-C8-C9    | 120.5(10) | C8-C9-C4    | 116.9(9)   |
| C8-C9-C10   | 119.9(9)  | C4-C9-C10   | 123.1(9)   |
| C11-C10-C12 | 112.4(9)  | C11-C10-C9  | 110.3(10)  |
| C12-C10-C9  | 110.9(9)  | C5-C13-C14  | 111.9(9)   |
| C5-C13-C15  | 111.2(9)  | C14-C13-C15 | 111.2(9)   |
| C21-C16-C17 | 124.7(9)  | C21-C16-N1  | 117.7(9)   |
| C17-C16-N1  | 117.5(8)  | C16-C17-C18 | 115.8(9)   |
| C16-C17-C25 | 126.9(9)  | C18-C17-C25 | 117.1(9)   |
| C19-C18-C17 | 120.4(11) | C18-C19-C20 | 120.5(11)  |
| C21-C20-C19 | 122.5(11) | C16-C21-C20 | 116.1(11)  |
| C16-C21-C22 | 123.6(10) | C20-C21-C22 | 120.2(10)  |
| C23-C22-C21 | 112.6(10) | C23-C22-C24 | 109.4(13)  |
| C21-C22-C24 | 112.3(11) | C26-C25-C27 | 108.8(9)   |
| C26-C25-C17 | 113.0(9)  | C27-C25-C17 | 111.8(9)   |
| H28-C28-C29 | 115.(9)   | H28-C28-N3  | 110.(9)    |

|             |           |             |           |
|-------------|-----------|-------------|-----------|
| C29-C28-N3  | 106.4(7)  | H28-C28-B2  | 95.(9)    |
| C29-C28-B2  | 112.3(8)  | N3-C28-B2   | 117.1(8)  |
| H29-C29-N4  | 124.(8)   | H29-C29-C28 | 118.(8)   |
| N4-C29-C28  | 117.6(8)  | C31-C30-C35 | 125.1(10) |
| C31-C30-N4  | 120.0(9)  | C35-C30-N4  | 114.9(9)  |
| C30-C31-C32 | 116.7(10) | C30-C31-C39 | 124.3(9)  |
| C32-C31-C39 | 118.9(11) | C33-C32-C31 | 119.9(12) |
| C34-C33-C32 | 121.5(12) | C33-C34-C35 | 121.6(12) |
| C30-C35-C34 | 115.1(11) | C30-C35-C36 | 123.2(9)  |
| C34-C35-C36 | 121.3(10) | C35-C36-C38 | 112.9(11) |
| C35-C36-C37 | 111.7(9)  | C38-C36-C37 | 109.4(10) |
| C41-C39-C40 | 110.0(10) | C41-C39-C31 | 109.7(10) |
| C40-C39-C31 | 114.3(11) | C47-C42-C43 | 121.2(10) |
| C47-C42-N3  | 120.3(9)  | C43-C42-N3  | 118.5(8)  |
| C44-C43-C42 | 117.7(10) | C44-C43-C51 | 119.0(9)  |
| C42-C43-C51 | 123.2(9)  | C45-C44-C43 | 122.6(11) |
| C46-C45-C44 | 118.1(11) | C45-C46-C47 | 123.7(11) |
| C42-C47-C46 | 116.4(10) | C42-C47-C48 | 121.8(10) |
| C46-C47-C48 | 121.7(9)  | C47-C48-C50 | 114.0(9)  |
| C47-C48-C49 | 108.9(9)  | C50-C48-C49 | 109.7(9)  |
| C43-C51-C53 | 112.6(9)  | C43-C51-C52 | 110.5(9)  |
| C53-C51-C52 | 109.3(9)  |             |           |

Compound **9**·(toluene)<sub>2</sub>

**Table S23.** Sample and crystal data for compound **9**·(toluene)<sub>2</sub>.

|                               |                                                                                                |                |
|-------------------------------|------------------------------------------------------------------------------------------------|----------------|
| <b>Identification code</b>    | <b>9</b> ·(toluene) <sub>2</sub>                                                               |                |
| <b>Chemical formula</b>       | C <sub>67</sub> H <sub>86</sub> B <sub>2</sub> I <sub>6</sub> N <sub>4</sub> S <sub>3</sub> Si |                |
| <b>Formula weight</b>         | 1854.68 g/mol                                                                                  |                |
| <b>Temperature</b>            | 135(2) K                                                                                       |                |
| <b>Wavelength</b>             | 0.71073 Å                                                                                      |                |
| <b>Crystal size</b>           | 0.040 x 0.140 x 0.200 mm                                                                       |                |
| <b>Crystal system</b>         | monoclinic                                                                                     |                |
| <b>Space group</b>            | P2 <sub>1</sub> /c (No. 14)                                                                    |                |
| <b>Unit cell dimensions</b>   | a = 20.950(19) Å                                                                               | α = 90°        |
|                               | b = 12.762(11) Å                                                                               | β = 101.17(3)° |
|                               | c = 28.79(2) Å                                                                                 | γ = 90°        |
| <b>Volume</b>                 | 7552(11) Å <sup>3</sup>                                                                        |                |
| <b>Z</b>                      | 4                                                                                              |                |
| <b>Density (calculated)</b>   | 1.631 g/cm <sup>3</sup>                                                                        |                |
| <b>Absorption coefficient</b> | 2.606 mm <sup>-1</sup>                                                                         |                |
| <b>F(000)</b>                 | 3624                                                                                           |                |

**Table S24.** Data collection and structure refinement for **9·(toluene)<sub>2</sub>**.

|                                          |                                                                                                                 |
|------------------------------------------|-----------------------------------------------------------------------------------------------------------------|
| <b>Theta range for data collection</b>   | 1.75 to 25.35°                                                                                                  |
| <b>Index ranges</b>                      | -25<=h<=25, -15<=k<=13, -34<=l<=30                                                                              |
| <b>Reflections collected</b>             | 35959                                                                                                           |
| <b>Independent reflections</b>           | 13805 [R(int) = 0.1128]                                                                                         |
| <b>Max. and min. transmission</b>        | 0.7454 and 0.5751                                                                                               |
| <b>Structure solution technique</b>      | direct methods                                                                                                  |
| <b>Structure solution program</b>        | SHELXT 2014/5 (Sheldrick, 2014)                                                                                 |
| <b>Refinement method</b>                 | Full-matrix least-squares on F <sup>2</sup>                                                                     |
| <b>Refinement program</b>                | SHELXL-2018/3 (Sheldrick, 2018)                                                                                 |
| <b>Function minimized</b>                | $\Sigma w(F_o^2 - F_c^2)^2$                                                                                     |
| <b>Data / restraints / parameters</b>    | 13805 / 24 / 738                                                                                                |
| <b>Goodness-of-fit on F<sup>2</sup></b>  | 1.003                                                                                                           |
| <b><math>\Delta/\sigma_{\max}</math></b> | 0.004                                                                                                           |
| <b>Final R indices</b>                   | 7518 data; I>2 $\sigma$ (I) R1 = 0.0661, wR2 = 0.0860<br>all data R1 = 0.1552, wR2 = 0.1052                     |
| <b>Weighting scheme</b>                  | w=1/[ $\sigma^2(F_o^2)+(0.0210P)^2$ ]<br>where P=(F <sub>o</sub> <sup>2</sup> +2F <sub>c</sub> <sup>2</sup> )/3 |
| <b>Largest diff. peak and hole</b>       | 0.873 and -1.282 eÅ <sup>-3</sup>                                                                               |
| <b>R.M.S. deviation from mean</b>        | 0.188 eÅ <sup>-3</sup>                                                                                          |

**Table S25.** Bond lengths (Å) for **9·(toluene)<sub>2</sub>**.

|         |           |         |           |
|---------|-----------|---------|-----------|
| I1-B1   | 2.278(10) | I2-B1   | 2.200(10) |
| I3-B1   | 2.219(10) | I4-Si1  | 2.406(3)  |
| I5-B2   | 2.119(11) | I6-B2   | 2.136(10) |
| Si1-N3  | 1.699(7)  | Si1-S3  | 2.156(3)  |
| Si1-S2  | 2.162(4)  | S1-C1   | 1.731(8)  |
| S1-B1   | 1.936(10) | S2-C2   | 1.750(8)  |
| S3-C3   | 1.728(9)  | B2-N4   | 1.393(11) |
| N1-C2   | 1.383(9)  | N1-C1   | 1.371(9)  |
| N1-C16  | 1.447(9)  | N2-C3   | 1.409(9)  |
| N2-C1   | 1.357(9)  | N2-C4   | 1.455(9)  |
| N3-C28  | 1.425(9)  | N3-C42  | 1.454(10) |
| N4-C30  | 1.439(10) | N4-C29  | 1.442(9)  |
| C2-C3   | 1.331(10) | C4-C9   | 1.401(10) |
| C4-C5   | 1.411(10) | C5-C6   | 1.375(10) |
| C5-C13  | 1.512(11) | C6-C7   | 1.371(11) |
| C7-C8   | 1.370(11) | C8-C9   | 1.394(10) |
| C9-C10  | 1.525(11) | C10-C11 | 1.506(12) |
| C10-C12 | 1.537(11) | C13-C14 | 1.519(11) |
| C13-C15 | 1.514(11) | C16-C17 | 1.403(10) |
| C16-C21 | 1.401(10) | C17-C18 | 1.385(11) |
| C17-C25 | 1.517(10) | C18-C19 | 1.371(11) |
| C19-C20 | 1.377(11) | C20-C21 | 1.393(10) |
| C21-C22 | 1.502(10) | C22-C24 | 1.514(12) |
| C22-C23 | 1.529(11) | C25-C27 | 1.499(12) |
| C25-C26 | 1.521(11) | C28-C29 | 1.326(10) |
| C30-C35 | 1.407(11) | C30-C31 | 1.410(11) |
| C31-C32 | 1.384(12) | C31-C39 | 1.509(12) |
| C32-C33 | 1.395(12) | C33-C34 | 1.375(12) |
| C34-C35 | 1.384(12) | C35-C36 | 1.492(11) |
| C36-C38 | 1.525(10) | C36-C37 | 1.533(11) |
| C39-C41 | 1.549(12) | C39-C40 | 1.541(11) |
| C42-C47 | 1.380(11) | C42-C43 | 1.410(11) |
| C43-C44 | 1.388(12) | C43-C51 | 1.498(11) |
| C44-C45 | 1.376(12) | C45-C46 | 1.383(12) |
| C46-C47 | 1.405(11) | C47-C48 | 1.510(11) |
| C48-C50 | 1.518(11) | C48-C49 | 1.546(12) |
| C51-C52 | 1.523(11) | C51-C53 | 1.527(11) |
| C54-C55 | 1.39      | C54-C59 | 1.39      |
| C54-C60 | 1.506(11) | C55-C56 | 1.39      |
| C56-C57 | 1.39      | C57-C58 | 1.39      |

|         |           |         |           |
|---------|-----------|---------|-----------|
| C58-C59 | 1.39      | C61-C62 | 1.358(14) |
| C61-C66 | 1.398(14) | C61-C67 | 1.501(14) |
| C62-C63 | 1.380(14) | C63-C64 | 1.370(14) |
| C64-C65 | 1.386(15) | C65-C66 | 1.362(14) |

**Table S26.** Bond angles (°) for **9·(toluene)<sub>2</sub>**.

|             |            |             |            |
|-------------|------------|-------------|------------|
| N3-Si1-S3   | 110.4(3)   | N3-Si1-S2   | 113.2(2)   |
| S3-Si1-S2   | 100.27(13) | N3-Si1-I4   | 110.3(3)   |
| S3-Si1-I4   | 111.82(12) | S2-Si1-I4   | 110.54(12) |
| C1-S1-B1    | 112.6(4)   | C2-S2-Si1   | 90.4(3)    |
| C3-S3-Si1   | 90.7(3)    | S1-B1-I3    | 111.7(5)   |
| S1-B1-I2    | 117.4(5)   | I3-B1-I2    | 112.4(4)   |
| S1-B1-I1    | 96.7(4)    | I3-B1-I1    | 109.9(4)   |
| I2-B1-I1    | 107.4(4)   | N4-B2-I5    | 121.3(7)   |
| N4-B2-I6    | 121.2(7)   | I5-B2-I6    | 117.4(5)   |
| C2-N1-C1    | 108.9(6)   | C2-N1-C16   | 122.7(6)   |
| C1-N1-C16   | 128.0(7)   | C3-N2-C1    | 108.8(6)   |
| C3-N2-C4    | 122.1(7)   | C1-N2-C4    | 128.5(7)   |
| C28-N3-C42  | 115.8(6)   | C28-N3-Si1  | 119.1(6)   |
| C42-N3-Si1  | 124.9(5)   | B2-N4-C30   | 121.9(7)   |
| B2-N4-C29   | 123.4(7)   | C30-N4-C29  | 114.7(7)   |
| N2-C1-N1    | 106.6(7)   | N2-C1-S1    | 131.7(6)   |
| N1-C1-S1    | 120.2(6)   | C3-C2-N1    | 108.4(7)   |
| C3-C2-S2    | 123.9(7)   | N1-C2-S2    | 127.5(6)   |
| N2-C3-C2    | 107.3(7)   | N2-C3-S3    | 127.0(6)   |
| C2-C3-S3    | 125.7(7)   | C9-C4-C5    | 123.9(7)   |
| C9-C4-N2    | 118.6(7)   | C5-C4-N2    | 117.3(7)   |
| C6-C5-C4    | 115.6(8)   | C6-C5-C13   | 121.1(8)   |
| C4-C5-C13   | 123.2(7)   | C5-C6-C7    | 121.7(8)   |
| C8-C7-C6    | 122.1(8)   | C7-C8-C9    | 119.7(8)   |
| C4-C9-C8    | 116.9(8)   | C4-C9-C10   | 123.9(7)   |
| C8-C9-C10   | 119.2(7)   | C11-C10-C9  | 111.7(7)   |
| C11-C10-C12 | 107.0(7)   | C9-C10-C12  | 110.9(7)   |
| C5-C13-C14  | 112.8(7)   | C5-C13-C15  | 109.4(7)   |
| C14-C13-C15 | 111.1(7)   | C17-C16-C21 | 123.2(7)   |
| C17-C16-N1  | 117.3(7)   | C21-C16-N1  | 119.3(7)   |
| C16-C17-C18 | 116.4(7)   | C16-C17-C25 | 123.6(7)   |
| C18-C17-C25 | 120.0(7)   | C19-C18-C17 | 122.4(8)   |
| C18-C19-C20 | 119.7(8)   | C19-C20-C21 | 121.7(8)   |
| C16-C21-C20 | 116.6(7)   | C16-C21-C22 | 123.1(7)   |
| C20-C21-C22 | 120.3(7)   | C24-C22-C23 | 110.1(7)   |
| C24-C22-C21 | 110.9(7)   | C23-C22-C21 | 111.8(7)   |
| C27-C25-C26 | 111.2(7)   | C27-C25-C17 | 111.0(7)   |
| C26-C25-C17 | 111.0(7)   | C29-C28-N3  | 122.4(8)   |
| C28-C29-N4  | 123.8(8)   | C35-C30-C31 | 122.8(8)   |
| C35-C30-N4  | 118.4(8)   | C31-C30-N4  | 118.7(8)   |

|             |           |             |           |
|-------------|-----------|-------------|-----------|
| C30-C31-C32 | 116.5(8)  | C30-C31-C39 | 122.9(9)  |
| C32-C31-C39 | 120.6(9)  | C33-C32-C31 | 122.4(9)  |
| C32-C33-C34 | 118.9(9)  | C35-C34-C33 | 122.4(9)  |
| C30-C35-C34 | 117.1(8)  | C30-C35-C36 | 122.6(8)  |
| C34-C35-C36 | 120.4(8)  | C35-C36-C38 | 113.0(7)  |
| C35-C36-C37 | 111.6(7)  | C38-C36-C37 | 108.4(7)  |
| C31-C39-C41 | 111.2(7)  | C31-C39-C40 | 110.7(8)  |
| C41-C39-C40 | 111.0(8)  | C47-C42-C43 | 124.3(8)  |
| C47-C42-N3  | 118.3(7)  | C43-C42-N3  | 117.3(8)  |
| C44-C43-C42 | 115.4(9)  | C44-C43-C51 | 121.0(8)  |
| C42-C43-C51 | 123.6(8)  | C43-C44-C45 | 123.4(9)  |
| C46-C45-C44 | 118.5(9)  | C45-C46-C47 | 122.1(9)  |
| C42-C47-C46 | 116.3(8)  | C42-C47-C48 | 124.0(8)  |
| C46-C47-C48 | 119.6(8)  | C50-C48-C47 | 111.1(7)  |
| C50-C48-C49 | 110.8(8)  | C47-C48-C49 | 111.0(8)  |
| C43-C51-C52 | 110.5(8)  | C43-C51-C53 | 112.5(8)  |
| C52-C51-C53 | 110.2(7)  | C55-C54-C59 | 120.0     |
| C55-C54-C60 | 123.0(8)  | C59-C54-C60 | 117.0(8)  |
| C54-C55-C56 | 120.0     | C57-C56-C55 | 120.0     |
| C56-C57-C58 | 120.0     | C59-C58-C57 | 120.0     |
| C58-C59-C54 | 120.0     | C62-C61-C66 | 117.7(12) |
| C62-C61-C67 | 120.5(12) | C66-C61-C67 | 121.8(12) |
| C63-C62-C61 | 121.8(12) | C62-C63-C64 | 120.4(12) |
| C65-C64-C63 | 118.4(12) | C66-C65-C64 | 120.8(12) |
| C65-C66-C61 | 120.9(12) |             |           |



## Compound 10

**Table S27.** Sample and crystal data for compound **10**.

|                               |                                                                                                                                     |
|-------------------------------|-------------------------------------------------------------------------------------------------------------------------------------|
| <b>Identification code</b>    | <b>10</b>                                                                                                                           |
| <b>Chemical formula</b>       | $C_{53}H_{70}BCl_3N_4S_3Si$                                                                                                         |
| <b>Formula weight</b>         | 1004.56 g/mol                                                                                                                       |
| <b>Temperature</b>            | 135(2) K                                                                                                                            |
| <b>Wavelength</b>             | 0.71073 Å                                                                                                                           |
| <b>Crystal size</b>           | 0.140 x 0.220 x 0.320 mm                                                                                                            |
| <b>Crystal system</b>         | monoclinic                                                                                                                          |
| <b>Space group</b>            | $P2_1/c$ (No. 14)                                                                                                                   |
| <b>Unit cell dimensions</b>   | $a = 14.4876(10)$ Å $\alpha = 90^\circ$<br>$b = 20.1276(13)$ Å $\beta = 91.557(2)^\circ$<br>$c = 18.9921(12)$ Å $\gamma = 90^\circ$ |
| <b>Volume</b>                 | $5536.1(6)$ Å <sup>3</sup>                                                                                                          |
| <b>Z</b>                      | 4                                                                                                                                   |
| <b>Density (calculated)</b>   | 1.205 g/cm <sup>3</sup>                                                                                                             |
| <b>Absorption coefficient</b> | 0.338 mm <sup>-1</sup>                                                                                                              |
| <b>F(000)</b>                 | 2136                                                                                                                                |

**Table S28.** Data collection and structure refinement for **10**.

|                                         |                                                                                                                                                               |
|-----------------------------------------|---------------------------------------------------------------------------------------------------------------------------------------------------------------|
| <b>Theta range for data collection</b>  | 2.37 to 25.46°                                                                                                                                                |
| <b>Index ranges</b>                     | -17≤h≤17, -24≤k≤24, -22≤l≤22                                                                                                                                  |
| <b>Reflections collected</b>            | 135304                                                                                                                                                        |
| <b>Independent reflections</b>          | 10241 [R(int) = 0.1633]                                                                                                                                       |
| <b>Max. and min. transmission</b>       | 0.7452 and 0.5357                                                                                                                                             |
| <b>Structure solution technique</b>     | direct methods                                                                                                                                                |
| <b>Structure solution program</b>       | SHELXT 2014/5 (Sheldrick, 2014)                                                                                                                               |
| <b>Refinement method</b>                | Full-matrix least-squares on F <sup>2</sup>                                                                                                                   |
| <b>Refinement program</b>               | SHELXL-2018/3 (Sheldrick, 2018)                                                                                                                               |
| <b>Function minimized</b>               | $\Sigma w(F_o^2 - F_c^2)^2$                                                                                                                                   |
| <b>Data / restraints / parameters</b>   | 10241 / 0 / 586                                                                                                                                               |
| <b>Goodness-of-fit on F<sup>2</sup></b> | 1.010                                                                                                                                                         |
| <b>Final R indices</b>                  | 6835 data; I>2σ(I)    R1 = 0.0566, wR2 = 0.0971<br>all data                    R1 = 0.1070, wR2 = 0.1141                                                      |
| <b>Weighting scheme</b>                 | w=1/[σ <sup>2</sup> (F <sub>o</sub> <sup>2</sup> )+(0.0260P) <sup>2</sup> +8.4385P]<br>where P=(F <sub>o</sub> <sup>2</sup> +2F <sub>c</sub> <sup>2</sup> )/3 |
| <b>Largest diff. peak and hole</b>      | 0.312 and -0.368 eÅ <sup>-3</sup>                                                                                                                             |
| <b>R.M.S. deviation from mean</b>       | 0.069 eÅ <sup>-3</sup>                                                                                                                                        |

**Table S29.** Bond lengths (Å) for **10**.

|         |            |         |            |
|---------|------------|---------|------------|
| Si1-N4  | 1.710(2)   | Si1-N3  | 1.710(2)   |
| Si1-C11 | 2.0522(11) | Si1-S3  | 2.1417(11) |
| S1-C1   | 1.655(3)   | S2-C2   | 1.746(3)   |
| S2-B1   | 1.793(4)   | S3-C3   | 1.747(3)   |
| Cl2-B1  | 1.737(4)   | Cl3-B1  | 1.743(4)   |
| N1-C1   | 1.373(4)   | N1-C2   | 1.397(4)   |
| N1-C16  | 1.448(4)   | N2-C1   | 1.373(4)   |
| N2-C3   | 1.401(3)   | N2-C4   | 1.445(4)   |
| N3-C42  | 1.438(4)   | N3-C28  | 1.416(4)   |
| N4-C30  | 1.443(4)   | N4-C29  | 1.414(4)   |
| C2-C3   | 1.341(4)   | C4-C9   | 1.395(4)   |
| C4-C5   | 1.399(4)   | C5-C6   | 1.395(4)   |
| C5-C13  | 1.516(4)   | C6-C7   | 1.376(5)   |
| C7-C8   | 1.371(5)   | C8-C9   | 1.394(4)   |
| C9-C10  | 1.513(4)   | C10-C11 | 1.517(5)   |
| C10-C12 | 1.503(5)   | C13-C14 | 1.530(5)   |
| C13-C15 | 1.523(5)   | C16-C21 | 1.392(4)   |
| C16-C17 | 1.397(4)   | C17-C18 | 1.392(4)   |
| C17-C25 | 1.517(5)   | C18-C19 | 1.367(5)   |
| C19-C20 | 1.386(5)   | C20-C21 | 1.394(4)   |
| C21-C22 | 1.515(4)   | C22-C24 | 1.529(5)   |
| C22-C23 | 1.528(5)   | C25-C27 | 1.522(5)   |
| C25-C26 | 1.522(5)   | C28-C29 | 1.328(4)   |
| C30-C31 | 1.405(4)   | C30-C35 | 1.409(4)   |
| C31-C32 | 1.383(4)   | C31-C39 | 1.517(4)   |
| C32-C33 | 1.380(5)   | C33-C34 | 1.374(5)   |
| C34-C35 | 1.393(4)   | C35-C36 | 1.509(4)   |
| C36-C38 | 1.531(4)   | C36-C37 | 1.531(5)   |
| C39-C40 | 1.527(5)   | C39-C41 | 1.528(5)   |
| C42-C43 | 1.410(4)   | C42-C47 | 1.402(4)   |
| C43-C44 | 1.393(4)   | C43-C51 | 1.518(4)   |
| C44-C45 | 1.376(5)   | C45-C46 | 1.383(5)   |
| C46-C47 | 1.389(4)   | C47-C48 | 1.520(5)   |
| C48-C50 | 1.527(5)   | C48-C49 | 1.529(5)   |
| C51-C52 | 1.529(4)   | C51-C53 | 1.523(4)   |

**Table S30.** Bond angles (°) for **10**.

|             |            |             |            |
|-------------|------------|-------------|------------|
| N4-Si1-N3   | 92.86(12)  | N4-Si1-C11  | 112.22(9)  |
| N3-Si1-C11  | 116.28(9)  | N4-Si1-S3   | 117.11(9)  |
| N3-Si1-S3   | 111.26(9)  | C11-Si1-S3  | 107.03(5)  |
| C2-S2-B1    | 102.92(16) | C3-S3-Si1   | 108.44(10) |
| C12-B1-C13  | 119.7(2)   | C12-B1-S2   | 124.2(2)   |
| C13-B1-S2   | 116.1(2)   | C1-N1-C2    | 110.3(2)   |
| C1-N1-C16   | 122.2(2)   | C2-N1-C16   | 126.4(2)   |
| C1-N2-C3    | 110.3(2)   | C1-N2-C4    | 122.7(2)   |
| C3-N2-C4    | 126.3(2)   | C42-N3-C28  | 119.9(2)   |
| C42-N3-Si1  | 129.10(19) | C28-N3-Si1  | 109.45(19) |
| C30-N4-C29  | 119.2(2)   | C30-N4-Si1  | 131.3(2)   |
| C29-N4-Si1  | 109.35(19) | N1-C1-N2    | 104.8(2)   |
| N1-C1-S1    | 127.6(2)   | N2-C1-S1    | 127.7(2)   |
| C3-C2-N1    | 107.6(2)   | C3-C2-S2    | 131.9(2)   |
| N1-C2-S2    | 120.6(2)   | C2-C3-N2    | 107.1(2)   |
| C2-C3-S3    | 131.1(2)   | N2-C3-S3    | 121.5(2)   |
| C9-C4-C5    | 123.6(3)   | C9-C4-N2    | 118.7(3)   |
| C5-C4-N2    | 117.6(3)   | C6-C5-C4    | 116.8(3)   |
| C6-C5-C13   | 120.3(3)   | C4-C5-C13   | 122.8(3)   |
| C7-C6-C5    | 120.7(3)   | C6-C7-C8    | 121.2(3)   |
| C7-C8-C9    | 121.0(3)   | C4-C9-C8    | 116.7(3)   |
| C4-C9-C10   | 122.7(3)   | C8-C9-C10   | 120.6(3)   |
| C9-C10-C11  | 111.7(3)   | C9-C10-C12  | 111.3(3)   |
| C11-C10-C12 | 110.2(3)   | C5-C13-C14  | 110.5(3)   |
| C5-C13-C15  | 112.6(3)   | C14-C13-C15 | 111.2(3)   |
| C21-C16-C17 | 123.9(3)   | C21-C16-N1  | 118.8(3)   |
| C17-C16-N1  | 117.3(3)   | C18-C17-C16 | 116.2(3)   |
| C18-C17-C25 | 121.0(3)   | C16-C17-C25 | 122.8(3)   |
| C17-C18-C19 | 122.0(3)   | C18-C19-C20 | 120.1(3)   |
| C21-C20-C19 | 120.9(3)   | C16-C21-C20 | 116.8(3)   |
| C16-C21-C22 | 122.6(3)   | C20-C21-C22 | 120.6(3)   |
| C21-C22-C24 | 111.3(3)   | C21-C22-C23 | 110.9(3)   |
| C24-C22-C23 | 111.6(3)   | C17-C25-C27 | 112.5(3)   |
| C17-C25-C26 | 111.6(3)   | C27-C25-C26 | 111.3(3)   |
| C29-C28-N3  | 113.8(3)   | C28-C29-N4  | 114.1(3)   |
| C31-C30-C35 | 121.6(3)   | C31-C30-N4  | 118.9(3)   |
| C35-C30-N4  | 119.4(3)   | C32-C31-C30 | 118.1(3)   |
| C32-C31-C39 | 120.1(3)   | C30-C31-C39 | 121.9(3)   |
| C33-C32-C31 | 121.3(3)   | C34-C33-C32 | 120.1(3)   |
| C33-C34-C35 | 121.5(3)   | C34-C35-C30 | 117.4(3)   |

|             |          |             |          |
|-------------|----------|-------------|----------|
| C34-C35-C36 | 120.4(3) | C30-C35-C36 | 122.1(3) |
| C35-C36-C38 | 110.1(3) | C35-C36-C37 | 111.9(3) |
| C38-C36-C37 | 110.7(3) | C31-C39-C40 | 111.7(3) |
| C31-C39-C41 | 111.1(3) | C40-C39-C41 | 110.9(3) |
| C43-C42-C47 | 122.0(3) | C43-C42-N3  | 118.9(3) |
| C47-C42-N3  | 119.1(3) | C42-C43-C44 | 117.4(3) |
| C42-C43-C51 | 122.1(3) | C44-C43-C51 | 120.4(3) |
| C45-C44-C43 | 121.4(3) | C44-C45-C46 | 120.2(3) |
| C47-C46-C45 | 121.2(3) | C46-C47-C42 | 117.8(3) |
| C46-C47-C48 | 120.3(3) | C42-C47-C48 | 121.7(3) |
| C47-C48-C50 | 113.7(3) | C47-C48-C49 | 109.6(3) |
| C50-C48-C49 | 110.6(3) | C52-C51-C43 | 110.8(3) |
| C52-C51-C53 | 110.1(3) | C43-C51-C53 | 113.5(3) |

**References:**

1. Z. Liu, C. Cui, *J. Organomet. Chem.* **2020**, *906*, 121041.
